1 **Reconstruction of Par polarity in apolar cells reveals a dynamic process of cortical**  
2 **polarization**

3

4 Kalyn Kono<sup>1,2</sup>

5 Shigeki Yoshiura<sup>2†</sup>

6 Ikumi Fujita<sup>2†</sup>

7 Yasushi Okada<sup>3,4</sup>

8 Atsunori Shitamukai<sup>2</sup>

9 Tatsuo Shibata<sup>5</sup>

10 Fumio Matsuzaki<sup>1,2\*</sup>

11

12 <sup>1</sup>Laboratory of Molecular Cell Biology and Development, Department of Animal  
13 Development and Physiology, Graduate School of Biostudies, Kyoto University.

14 <sup>2</sup>Laboratory for Cell Asymmetry, RIKEN Center for Biosystems Dynamics Research.

15 <sup>3</sup>Laboratory for Cell Polarity Regulation, RIKEN Center for Biosystems Dynamics  
16 Research.

17 <sup>4</sup>Department of Physics (GR), Graduate School of Science, University of Tokyo.

18 <sup>5</sup>Laboratory for Physical Biology, RIKEN Center for Biosystems Dynamics Research.

19

20 †: equally contributed to this study

21 \*corresponding author

22 e-mail: [fumio.matsuzaki@riken.jp](mailto:fumio.matsuzaki@riken.jp)

## 1 **Abstract**

2 Cellular polarization is fundamental for various biological processes. The Par network  
3 system is conserved for cellular polarization. Its core complex consists of Par3, Par6,  
4 and aPKC. However, the dynamic processes that occur during polarization are not well  
5 understood. Here, we artificially reconstructed Par-dependent polarity using  
6 non-polarized *Drosophila* S2 cells expressing all three components endogenously in the  
7 cytoplasm. The results indicated that elevated Par3 expression induces cortical  
8 localization of the Par-complex at the interphase. Its asymmetric distribution goes  
9 through three steps: emergence of cortical dots, development of island-like structures  
10 with dynamic amorphous shapes, repeating fusion and fission, and polarized clustering  
11 of the islands. Our findings also showed that these islands contain a meshwork of  
12 unit-like segments. Par-complex patches resembling Par-islands exist in *Drosophila*  
13 mitotic neuroblasts. Thus, this reconstruction system provides an experimental  
14 paradigm to study features of the assembly process and structure of Par-dependent  
15 cell-autonomous polarity.

16

## 17 **INTRODUCTION**

18 Polarization is a fundamental cellular property that plays a vital role in  
19 various biological processes in multi-cellular as well as single cell organisms.  
20 Par-complex system is a conserved mechanism that regulates cell  
21 polarization (Kemphues *et al*, 1988; Suzuki & Ohno, 2006; Johnston, 2018). The core  
22 Par-complex consists of Par6, Par3, and typical protein kinase C (aPKC) (Kemphues *et*  
23 *al*, 1988; Tabuse *et al*, 1998). Domain structures of these components and their  
24 interactions have been extensively studied (Lang & Munro, 2017). Par3 exhibits  
25 membrane binding affinity through its C-terminal domain and the ability to  
26 self-oligomerize via its N-terminal CR1 domain, which is essential for its localization  
27 and function (Benton, 2003; Mizuno *et al*, 2003; Krahn *et al*, 2010; Harris, 2017)  
28 Structural studies have revealed that the CR1 domain forms helical polymers of 10 nm

1 diameter(Zhang *et al*, 2013). Par6 and aPKC, which form a stable subcomplex, interact  
2 with the CR3 and PDZ domains of Par3(Izumi *et al*, 1998; Renschler *et al*, 2018).  
3 Phosphorylation of this domain by aPKC inhibits this interaction(Morais-de-Sá *et al*,  
4 2010; Soriano *et al*, 2016). Thus, Par-complex assembly is a dynamic process. CDC42  
5 binds to the aPKC-Par6 subcomplex and anchors it to the cell membrane as a diffusible  
6 cortical form(Joberty *et al*, 2000; Aceto *et al*, 2006; Rodriguez *et al*, 2017; Wang *et al*,  
7 2017) On the other hand, Lgl and/or Par1 kinase act as inhibitory factors against  
8 aPKC(Guo & Kemphues, 1995; Betschinger *et al*, 2003; Yamanaka *et al*, 2003; Plant *et*  
9 *al*, 2003; Hurov *et al*, 2004), and distribute complementarily to the core Par complex .  
10 Interplay between these components results in cytocortical asymmetry(Doerflinger *et al*,  
11 2006; Sailer *et al*, 2015).

12 Cell polarization involving the Par-complex *in situ* is linked to various other  
13 processes. The Par-complex creates epithelial cell polarity during interphase at the  
14 subapical domain (including tight junctions) that is tightly associated with adherens  
15 junctions, where Par3 primarily localizes(Rodriguez-Boulan & Macara, 2014; Suzuki &  
16 Ohno, 2006). On the other hand, cell polarization is coupled with mitosis during  
17 asymmetric divisions, and autonomously induced or triggered by an external cue,  
18 depending on the cell type(Yamashita *et al*, 2010). Because of such association between  
19 Par-dependent polarization and other processes, the Par-complex exhibits different  
20 behavioral characteristics in an individual context, making it difficult to determine  
21 general features of the dynamic process taking place during cell polarization by the  
22 Par-complex. We attempted to address this problem by establishing an artificial  
23 polarization system induced by the Par-complex(Baas *et al*, 2004; Johnston *et al*, 2009).  
24 We used *Drosophila* Schneider cells (S2 cells) of mesodermal origin as host  
25 cells(Schneider, 1972). They are neither polarized nor adhere to the substratum and  
26 between cells. The 3 core components of the Par-complex are endogenously expressed  
27 in S2 cells but are distributed in the cytoplasm throughout the cell cycle. Thus, S2 cells  
28 appear to be an ideal system for cell polarity induction.

## 1 RESULTS

### 2 S2 cells polarize by an elevated expression of Par3

3 First, we tested the effect of overexpressing each core component of the  
4 Par-complex in S2 cells, which distribute these components evenly throughout the  
5 cytoplasm and divide symmetrically (Fig. 1a). We found that all core components of the  
6 Par-complex cortically co-localized in an asymmetric manner when Par3 was over  
7 expressed, but did not cortically localized, when Par6 or aPKC was overexpressed (Figs.  
8 1b, c, and data not shown). We overexpressed myc-Par3 (or Par3-mKate2) via the  
9 *actin*-promoter (*act5c*)-driven *Gal4-UAS* system (*Act-Gal4>UAS*) by transfection (see  
10 Methods), with or without *actin*-promoter-*Par6-GFP* (*pAct-Par6-GFP*) as a live marker,  
11 which was uniformly distributed in the cytoplasm in the absence of Par3 overexpression  
12 (Fig. 1b). Among transfected cells that exhibited cortical Par complex distribution, a  
13 fraction exhibited an asymmetrically localized Par-complex (Fig. 1c, Supplementary Fig.  
14 1b), while the rest of the cells localized uniformly to the cortex (see below).  
15 Asymmetric distribution of the Par-complex induced by Par3 overexpression required  
16 endogenous aPKC and Par6 (Fig. 1d). The expression level of exogenous Par3 was also  
17 important for S2 cell polarization. Cortical polarization was not observed (Fig. 1b)  
18 when Par3 expression, directly driven by the *actin* promoter, was approximately 1/40 of  
19 that of the *Act-Gal4>UAS* system (Supplementary Fig. 1a).

20 We next examined the effect of endogenous Lgl that was largely localized  
21 uniformly along the cortex with a cytoplasmic distribution in S2 cells, prior to Par3  
22 overexpression (Fig. 1e). When Par3 was distributed asymmetrically along the cortex,  
23 Lgl and Par3 distributed in a complementary manner (Fig. 1f). Knockdown of *lgl* via  
24 RNAi and the expression of Lgl3A, which aPKC is not able to phosphorylate, showed  
25 that Lgl and its phosphorylation by aPKC are required for asymmetric Par-complex  
26 localization in S2 cells (Fig. 1g,h).

27 To evaluate the degree of polarization of transfected cells, we introduced the  
28 asymmetric index (ASI), a measure of the polarized Par-complex distribution, which,

1 according to Derivery et al. (Derivery *et al*, 2015), indicates the degree of polarization of  
2 a fluorescent marker distributed along the equatorial cortex (Supplementary Fig. 1b).  
3 ASI distribution was compared with that of membrane-bound GFP (memGFP), which is  
4 essentially non-polarized (the control). The ASI value of memGFP ranged from 0 to  
5 0.35 due to fluctuation. Par3 cortical distribution was categorized into 2 groups in  
6 comparison with memGFP. Cells with an ASI in the same range as that of memGFP  
7 were regarded as non-polarized. Those cells showing an ASI larger than that of the  
8 mem-GFP were interpreted as polarized. Among transfected cells showing cortical  
9 distribution of the Par complex, 38% were polarized, while 62% were non-polarized  
10 (Supplementary Fig. 1c).

11 Furthermore, we examined the 3-dimensional (3D) distribution of the Par  
12 complex in S2 cells by reconstructing serial images at steady state two days following  
13 transfection. Interestingly, the region where the Par-complex accumulated was not  
14 uniform but consisted of multiple large aggregates (Fig. 1i). These large aggregates  
15 were termed “Par-islands”. These islands dynamically changed their arrangement on the  
16 surface of the S2 cells (Supplementary movie 1).

### 17 **Temporal patterns of Par-complex polarization.**

18 To investigate temporal patterns of polarized distribution of the Par-complex,  
19 we induced Par3 expression via the *Metallothionein* promoter, which is activated in the  
20 presence of CuSO<sub>4</sub>. We transfected S2 cells with *pMT-myc-Par3-mKate2*,  
21 *pAct-Par6-GFP* and *pAct-aPKC*. Because expression of Par6-GFP and aPKC reached  
22 steady levels two days following transfection (Supplementary Fig. 2a), induction of  
23 Par3-mKate2 was initiated at this time. This indicated that the Par-complex first  
24 emerged in dot form (designated Par-dot) in the cell cortex during the initial phase of  
25 myc-Par3-mKate2 elevation, 2 -3.5 h following induction (Fig. 2a-c, Supplementary  
26 movie 2). Interestingly, Par-dots emerged in a restricted region of the cell cortex (Fig.  
27 2c).

1           Par-dots continued to grow in size via self-expansion, repeated fusion and less  
2 frequent fission (Fig. 2d). These dots then developed into “islands” of various sizes and  
3 shapes 2.5-6 h following induction (Figs. 2a,b), as observed in the *UAS-Gal4* system  
4 (Fig. 1i). During this period, the distribution of Par-islands occurred via 2 separate  
5 processes, polar and non-polar clustering, which corresponded with temporal changes in  
6 ASI values (Figs. 2a,b; Supplementary Fig. 2e). However, there was no significant  
7 difference between polarized cells and non-polar cells in either the time course of  
8 Par3-mKate2 expression levels or the Par6-GFP/Par3-mKate2 ratio (Supplementary  
9 Figs. 2b-d). While the average steady state amount of Par3-mKate2, driven by the  
10 *Metallothionein* promoter was approximately 1/18-fold of that driven by the  
11 *Act-Gal4>UAS* system (Supplementary Fig. 2f), the appearance of the islands was  
12 similar between the two expression systems (Figs. 1i and 2a).

13           Island structures of the Par-complex were also observed in the apical domain  
14 of *Drosophila* mitotic neuroblasts (Fig. 2g), suggesting that formation of Par-islands  
15 may be a common process during the polarized cortical distribution of the Par-complex  
16 irrespective of cell cycle phases.

### 17 **Dynamics at the steady state**

18           Once the Par3-mKate2 expression level steadied about 8 h following  
19 induction, approximately 30% of cells with Par6-GFP localized cortically demonstrated  
20 polarized distribution of Par6-GFP, resulting in a crescent in the equatorial plane ( $ASI >$   
21  $0.35$ ), while the rest of cells showed a non-polarized cortical distribution ( $ASI \leq 0.35$ );  
22 (Fig. 3a). At steady state, Par-islands dynamically change their mutual positions (Fig.  
23 3b, Supplementary movie 3). However, their asymmetric clustering and non-polar  
24 distribution were largely maintained for at least several hours, once cells reached steady  
25 state (Supplementary Fig. 2g), suggesting that both polar and non-polar clustering of  
26 Par-islands was fairly stable. In both states of Par-island clustering, the distribution of  
27 Par-islands and Lgl in S2 cells were mutually exclusive (Figs. 3c,d, Supplementary  
28 movies 4, 5), suggesting that Lgl plays a role in the stability of the 2 states. Interestingly,

1 Par-islands were never unified into one large island regardless of their dynamic  
2 movements as well as fusion and fission (Fig. 3b).

3       Upon mitosis, cortical Par-islands disassembled and disappeared (Fig. 3e).  
4 However, just prior to cell cleavage, small Par-dots reappeared preferentially in the  
5 region opposite the cleavage site (n=13/15). Consistently, the position of the  
6 centrosome, which is normally located on the far side from the cleavage site, coincided  
7 weakly with the region of Par-dot reappearance (Supplementary Figs. 2h-j).

### 8 **Structural analysis of the assembly state of the Par-complex**

9       The island form of the Par-complex is a unique structure with a slightly  
10 convex shape (Figs. 2a,b, 3b, Supplementary movie 3). To better understand the  
11 organization of Par-islands, we investigated their structure at the super-resolution level.  
12 We performed super-resolution radial fluctuation (SRRF) analysis (Gustafsson *et al*,  
13 2016), using confocal images of fixed samples, double-stained by Par3-mKate2 and  
14 Par6-GFP. This analysis revealed that both Par3-mKate2 and Par6-GFP exhibited  
15 polygonal shaped islands of various types (Figs. 4a,b, Supplementary Figs. 3a, b). In  
16 order to determine whether there was regularity in these structures, we measured  
17 contour lengths of the Par3-mKate2-stained meshwork, including separate rods and  
18 polygons. This measurement yielded distribution of lengths with multiple peaks in the  
19 density plot. We then searched the regularity of these multiple peaks. We found that it  
20 was well fitted with a combination of seven Gaussian curves, which exhibited a peak  
21 interval of  $0.38 \pm 0.06 \mu\text{m}$  (mean  $\pm$  s.d., hereafter); (Figs. 4c, d). We also performed  
22 spectral analysis of the density plot, and obtained a single major frequency of  $2.4 \mu\text{m}^{-1}$ ,  
23 which gives a peak interval of  $0.42 \mu\text{m}$  (Fig. 4e). These two analyses thus give  
24 consistent results with each other.

25       We also observed Par-islands of Par3-GFP and Par6-GFP separately via  
26 STED microscopy, and found similar meshwork structures in the deconvoluted STED  
27 images (Figs. 4f-h). The linear part of segments in the meshwork structures were  
28 measured (Supplementary Figs. 4a-d), and exhibited a length of  $0.39 \pm 0.09 \mu\text{m}$  (Fig. 4i).

1 Thus, these two methods essentially provided the same value for the segmental length.  
2 In addition, these segments had a fairly homogeneous diameter in STED microscopic  
3 images, where the mean half width of Par-segments was  $0.22 \pm 0.03 \mu\text{m}$ , (Supplementary  
4 Figs. 4e, f). These results raise the possibility that the Par-island meshwork contains a  
5 unit segment. Indeed, separate rod- or string-shape structures as well as open square-  
6 structures were often observed in the earlier phases of the Par-complex aggregation time  
7 course (Supplementary Fig. 4g, movie 2), supporting the notion that Par-islands are  
8 assembled from these elemental structures, generating regularity in the meshwork  
9 organization.

## 10 **Roles of Par components and the cytoskeleton in polarity formation**

11 Because the elevation of Par3 expression induced cortical polarization in S2  
12 cells, we investigated the role of functional domains of Par3 by observing phenotypes  
13 with Par6-GFP following the overexpression of mutant *Par3* forms via the  
14 *Metallothionein* promoter (Fig. 5a). First, we tested the role of the CR1 domain  
15 responsible for self-polymerization in the polarized Par-complex assembly (Benton,  
16 2003; Mizuno *et al*, 2003). Overexpression of Par3 lacking CR1 (Par3 $\Delta$ CR1) in the  
17 presence of the endogenous Par3 compromised the cortical Par-complex assembly  
18 significantly. The Par-complex was broadly distributed at the cell cortex in the initial  
19 stages, when dots were very faintly visible. While denser parts similar to Par-islands  
20 formed later, they were mostly faint with ambiguous contours, compared to those  
21 formed by wild type Par3 expression (compare Figs. 2a, b and Fig. 5b), and the  
22 Par-island distribution was not eventually polarized (Fig. 5e). These results suggested  
23 that the CR1 domain was important for all processes during the development of  
24 macro-scale structures of the Par-complex. However, this phenotype was different from  
25 that of the non-transfected S2 cells, suggesting that a large amount of Par3 $\Delta$ CR1  
26 contributes to cortical Par-complex aggregation in the presence of endogenous Par3.

27 We next examined the effect of aPKC-dependent phosphorylation at Serine  
28 980 in the CR3 domain, which is necessary for dissociation of Par3 from aPKC (Fig.



1 5a)(Morais-de-Sá *et al*, 2010). Overexpressing the non-phosphorylatable form,  
2 Par3S980A, which tightly binds aPKC(Morais-de-Sá *et al*, 2010), increased the  
3 polarized cell population, where 49% of cells with cortical Par3 showed an ASI > 0.35,  
4 and a degree of polarization with a mean ASI value of  $0.54 \pm 0.14$  for polarized cells.  
5 This suggested strong enhancement of Par-complex clustering (Figs. 5c, f). Clustering  
6 of the Par-islands was so tight under this condition that the polarized region sometimes  
7 assumed a bowl-like shape, in which the island structure was hardly discernible.  
8 Subsequently, this dense aggregation gradually separated into small and nested islands.  
9 Dense packing of the Par complex containing Par3S980A suggested that the turnover of  
10 Par3-aPKC association and dissociation played a role in the normal clustering of  
11 Par-islands. This was similar to that of *Drosophila* epithelial cells, wherein Par3S980A  
12 colocalized with aPKC-Par6 in the apical domain with disorganized adhesion  
13 belts(Morais-de-Sá *et al*, 2010).

14 Next, we examined the effect of the membrane association region (MAR) of  
15 Par3 by overexpressing Par3 $\Delta$ MAR(Krahn *et al*, 2010). The Par-complex no longer  
16 localized cortically, but formed several cytoplasmic aggregates, which coalesced into a  
17 single large sphere (Fig. 5d). Thus, the functional domains of Par3 and the interactions  
18 between these domains, together, play a role in the properly polarized distribution of the  
19 Par-complex in the S2 cell system.

20 Lastly, we examined the effects of the actin cytoskeleton on islands. While  
21 ROCK inhibitor, Y27632, did not significantly affect the behavior of Par-islands (data  
22 not shown), an actin inhibitor, Latrunculin B, changed the islands into a spherical shape,  
23 which frequently formed membrane protrusions (Fig. 5g, Supplementary movie 5),  
24 suggesting that the actin-membrane skeleton is necessary to balance the surface tension  
25 of Par-islands (see Discussion).

## 26 Discussion

27 In this study, we reconstructed Par-complex-dependent cortical cell polarity induced by  
28 Par3 overexpression in non-polar S2 cells, using the *Gal4-UAS* system and the

1 *Metallothionein* promoter for Par3 expression. Because this polarity requires  
2 endogenous Par6, aPKC, and Lgl, the reconstruction system reproduced the  
3 fundamental properties of Par-dependent polarization *in vivo*, at least in part. While  
4 there is no firm information regarding the Par3 protein level in polarized cells *in vivo*,  
5 the ratio of overexpressed Par3 protein level to endogenous Par3, in S2 cells, was  
6 estimated to be approximately 300-fold and 20-fold for the *Gal4-UAS* system and  
7 *Metallothionein* promoter, respectively (Supplementary Fig. 5).

### 8 **Temporal patterns of Par-complex aggregation**

9 In our reconstruction system, cortical asymmetry began with the formation and growth  
10 of cortical dot-like structures, which were also reportedly associated with anterior  
11 localization of the Par-complex in *C. elegans* zygotes (Wang *et al*, 2017; Dickinson *et al*,  
12 2017; Munro *et al*, 2004). Par-dots in the S2 cell system included all 3 Par complex  
13 components. Thus, these dots appear to be the common initial process of Par-complex  
14 cortical aggregation. The subsequent process of asymmetric localization proceeds in the  
15 form of Par-islands with amorphous and dynamic behavior. To our knowledge, this  
16 structure has not been reported in cortical Par-complex assembly in *C. elegans* or  
17 *Drosophila*. However, island-like structures were observed during asymmetric Par  
18 complex distribution in *Drosophila* neuroblasts, suggesting that Par-islands were not  
19 specific to this artificial system that used apolar S2 cells.

20 In *C. elegans*, asymmetric segregation of the Par-complex is driven by  
21 cortical flow and asymmetric contraction of the actomyosin meshwork (Munro *et al*,  
22 2004; Motegi & Sugimoto, 2006). However, there was no indication that cortical flow  
23 was involved in the asymmetric clustering of the Par-complex in S2 cells. Furthermore,  
24 no directional movement towards the pole of polarization was observed. Interestingly,  
25 initial dot formation appeared to be biased towards the region opposite the cleavage  
26 point, where the centrosome also appeared to be located, which was consistent with a  
27 recent study on *Drosophila* (Loyer & Januschke, 2018; Januschke & Gonzalez, 2010;  
28 Jiang *et al*, 2015). Thus, the cleavage point and/or the centrosome may be a general

1 positional cue for the initiation of Par-complex-dependent cell polarity. In this context,  
2 polarization process of the S2 cell system is likely to be cell-autonomous and dependent  
3 on the induction of polarity proteins, wherein the orientation of polarity appeared to be  
4 dependent on internal cue(s).

5

## 6 **The morphology and dynamics of Par-islands**

7 Par-complex assembly at the cortex of S2 cells appears to stabilize the cell  
8 membrane because membrane filopodia extensively formed in areas where Par-islands  
9 were absent (Supplementary movie 2). Also, cell membrane curvature was higher where  
10 Par-islands were attached, compared with that of the surrounding areas (Fig. 5g).  
11 Membrane curvature may be determined by the balance between elasticity of the  
12 cortical cytoskeleton, the affinity of the Par-complex towards the cell membrane, and  
13 possibly the surface tension of the Par-island. Membrane affinity of the Par-complex is  
14 mediated by Par3 MAR, which interacts with phosphoinositides (PIPs) (Krahn *et al*,  
15 2010)and/or by Par6-cdc42 interaction(Joberty *et al*, 2000). The convex shape of the  
16 Par-island and its higher membrane curvature reflects its relatively high surface tension.  
17 This is supported by the fact that disruption of the actin cytoskeleton by Latrunculin B  
18 treatment leads to a curled or spherical Par-island, inducing dynamic cell membrane  
19 protrusions. This phenomenon may be explained as follows; disruption of the cortical  
20 cytoskeleton leads to the loss of its elasticity, which had balanced the surface tension of  
21 the Par-island. The resulting imbalance in surface tension may cause the Par-island to  
22 shrink into a bowl or sphere shape, thereby bending the cell membrane outward and  
23 conferring protrusive activity to the cell membrane. In contrast, when membrane  
24 affinity is quite low, as in the case of Par3 $\Delta$ MAR, Par-island shape is not affected by  
25 either cortical cytoskeleton elasticity or membrane affinity, and its shape would be  
26 determined only by the surface tension of Par3-islands. Under these conditions, we  
27 found that the Par-complex forms small cytoplasmic droplets, which subsequently

1 coalesce into a spherical, densely packed structure, suggesting that phase separation  
2 takes place between the Par-complex aggregates and the cytoplasm(Hyman *et al*, 2014).

### 3 **Molecular network of the Par-complex in the island state.**

4 In this study, we revealed that a Par-island is a meshwork of various  
5 polygonal shapes, which appear to be unit-like segments with an average length of  
6 approximately 0.4  $\mu\text{m}$ . Isolated fragments such as single fragments and structures made  
7 up of a few connected fragments were observed during the development of Par-islands  
8 via live-imaging. These observations suggested that these isolated fragments assembled  
9 into a meshwork to form islands. These islands change shape rapidly during their  
10 movement along the cortex, and sometimes fuse to release pieces of different sizes,  
11 raising the possibility that Par-islands and small free fragments are mutually  
12 exchangeable. The factors that determine the size of these unit segments need further  
13 investigation.

14 Par3 is known to polymerize *in vitro* via the CR1 domain at its N-terminus to  
15 form a helical polymer of 8-fold symmetry(Zhang *et al*, 2013; Feng *et al*, 2007).  
16 Whether Par3 polymers are involved in the cortical cluster of the Par complex remain  
17 unclear. Our super-resolution microscopic observations and the ability of Par3 to form  
18 filaments lead to the simple hypothesis that the unit segment of a Par-island is formed  
19 by Par3 polymers as the core structure. Cell phenotypes expressing Par3 lacking its  
20 oligomerization domain, Par3 $\Delta$ CR1, is compatible with this hypothesis. While there are  
21 many possibilities via which Par3 filaments may form a unit segment, a single Par3  
22 polymer may form a single segment. Another possibility is for Par3 polymers to be  
23 aligned along the long axis of the segment. Since Par6 and aPKC bind the PDZ and  
24 CR3 domains of Par3, respectively, Par6 and aPKC may act as cross linkers between  
25 segments(Feng *et al*, 2007). Given the phenotype of ParS980A overexpression, the  
26 association of Par3 and aPKC by aPKC phosphorylation may confer flexibility and  
27 dynamism to the structure and/or assembly of the segmental elements. These  
28 hypotheses need to be tested in future studies.

## 1 **The two states of the Par-island distribution at steady state**

2 An interesting property of Par-islands is that they are not unified into one  
3 large island under the cell membrane, even when polarized. Overexpression of  
4 Par3 $\Delta$ MAR or Par3S980A is an exception. In the latter case, rapid and stable formation  
5 of the cortical Par-complex does not seem to permit separate island formation, and a  
6 large, transient dome is formed instead. In the former case, the Par-complex aggregates  
7 to form one large sphere. This cytoplasmic phenomenon is likely to be due to a phase  
8 separation between the Par-complex and the cytoplasm. Considering this property of the  
9 Par-complex, the unique feature of Par-islands associated with the cell membrane may  
10 reflect phase separation in 2 dimensions.

11 Steady state Par-island distribution in a cell may be classified into two  
12 different states, polarized and non-polarized. While we failed to identify a single  
13 parameter correlating these 2 states (Supplementary Fig. 2**b-d**), our analysis shows that  
14 the 2 states of island distribution are nearly fixed during the formation of islands  
15 (Supplementary Fig. 2**e**). Because the position of island formation appears to be  
16 stochastic, variation in the position of Par-island formation across the cell may explain  
17 the 2 localization patterns of Par-islands. Since Lgl distribution is largely  
18 complementary to dots and islands, this molecule may contribute to stabilize the 2 states  
19 of island distribution at the cellular scale (Betschinger *et al*, 2003; Guo & Kemphues,  
20 1995). Thus, these 2 different states of Par-island distribution may be the outcome of 2  
21 stable solutions of the reaction diffusion system (Chau *et al*, 2012; Goehring *et al*, 2011),  
22 where a negative regulator Lgl is involved (Betschinger *et al*, 2003). The initial  
23 condition, which is possibly determined by a stochastic distribution of islands, may  
24 select one of the two stable patterns in a cell. We propose that such cell-scale patterning  
25 is coupled with local phase separation of Par-islands as previously described for the  
26 membrane lipid domain (John & Bär, 2005).

27 In summary, we have developed a potential Par complex-polarization system  
28 upon induction of Par3 in non-polar S2 cells, which provides a useful model for

- 1 cell-autonomous cell polarization, allowing us to easily manipulate gene expression and
- 2 image at the super-resolution level. One intriguing challenge will be the coupling of
- 3 mitosis with cell polarization in this system to induce asymmetric division.

## 1 **Materials and Methods**

### 2 **Cell culture**

3 S2 cell culture and transfection were performed as previously described (Ogawa et al.,  
4 2009). Expression vectors were transfected at two days prior to microscopic or Western  
5 blot analysis. For induction of the *Metallothionein* promoter, 100 mM CuSO<sub>4</sub> solution  
6 was added to a medium at a final concentration of 1 mM.

7

### 8 **Live cell imaging**

9 Cells were mounted on a 35 mm glass-bottom dish coated with 15 µg/ml  
10 poly-L-ornithine and incubated at 25°C for 30 min, followed by microscopic analysis.  
11 Images were taken at a 1 µm z-interval with a spinning disk confocal microscopy  
12 CSU-W1 (Yokogawa, Tokyo, Japan) equipped with a sCMOS camera Neo (Andor,  
13 Belfast, Northern Ireland) and MetaMorph software (Molecular Devices, San Jose, CA,  
14 USA).

15

### 16 **Immunostaining**

17 For immunostaining of S2 cells, transfected cells were mounted on a  
18 poly-L-ornithine-coated cover slip and fixed with 4% paraformaldehyde in PBS for 15  
19 min at room temperature. Cells were washed with PBS, followed by treatment with  
20 0.1% Triton-X100 in PBS for 15 min. After washed with PBS, cells were treated with a  
21 blocking buffer containing 2% BSA in PBS for 30 min and incubated with primary  
22 antibodies in the blocking buffer for 30 min, followed by incubation with secondary  
23 antibodies for 30 min. Immunostained cells were embedded in mounting medium  
24 PermaFluor (Thermo Fisher Scientific) and analyzed with a confocal microscopes  
25 LSM510 (Zeiss, Oberkochen, Germany). For super-resolution microscopy, samples  
26 were embedded in ProLong Glass Antifade Mountant (Thermo Fisher Scientific).

27 For immunostaining of *Drosophila* neuroblasts, brains isolated from third  
28 instar larvae were fixed with 4% paraformaldehyde in PBS for 20 min at room  
29 temperature. Samples were treated with the blocking buffer for 1 h, followed by  
30 incubation with primary antibodies and secondary antibodies for 1 h each. Samples  
31 were then embedded in ProLong Gold Antifade Mountant (Thermo Fisher Scientific)  
32 and analyzed with a confocal microscope LSM880 (Zeiss).

1 Primary antibodies used were anti-aPKC (rabbit polyclonal, used at 1:1000,  
2 Santa Cruz), anti-Par-3 (rabbit polyclonal, used at 1:1000 or mouse monoclonal, used at  
3 1:100)(Ohshiro *et al*, 2000), anti-Par-6 (rabbit polyclonal, used at 1:1000)(Izumi *et al*,  
4 2004), anti-Myc (chicken polyclonal, used at 1:1000, Bethyl), anti-Flag (mouse  
5 monoclonal, used for 1:1000), anti-Miranda (Mouse monoclonal, used at 1:100)(Ohshiro  
6 *et al*, 2000), anti-Lgl (rabbit polyclonal, used for 1:1000) (Ohshiro *et al*, 2000),  
7 anti-GFP (chicken polyclonal or mouse monoclonal, used for 1:1000). Secondary  
8 antibodies used were anti-Rabbit Alexa Fluor488 (Donkey polyclonal, Jackson Immuno  
9 Research), anti-Mouse Alexa Fluor488 (Donkey polyclonal, Jackson Immuno Research),  
10 anti-chicken Alexa Fluor488 (Donkey polyclonal, Jackson Immuno Research),  
11 anti-Rabbit Cyanin3 (Donkey polyclonal, Jackson Immuno Research), anti-Mouse  
12 Cyanin3 (Donkey polyclonal, Jackson Immuno Research), anti-chicken Cyanin3  
13 (Donkey polyclonal, , Jackson Immuno Research), anti-Rabbit Alexa Fluor647 (Donkey  
14 polyclonal, Jackson Immuno Research). All of them are used at 1:4000.

15

## 16 **Super-resolution microscopy**

17 For the super-resolution radial fluctuations (SRRF) methodc, confocal imaging was  
18 performed using LSM880 (Zeiss) with an objective lens Plan-Apochromat 63x/1.4 Oil  
19 DIC M27 (Zeiss). A series of 200 frames was obtained for each cell with a pixel size of  
20 53 nm and 160 ms exposure time. Drift-correction and reconstruction of SRRF images  
21 were performed with an ImageJ plug-in NanoJ-SRRF(Gustafsson *et al*, 2016).

22 Using SRRF-processed images, Par3 contour lengths along the meshwork  
23 were manually traced with Fiji. Each image was overlaid by an edge-enhanced image  
24 generated with the Sobel filter, to highlight Par3 contour shapes. Lengths between their  
25 terminal ends and/or branching points were measured. A histogram and a density plot  
26 were generated from all contour lengths, and the shape of the density plot was fitted  
27 with a linear combination of 7 Gaussian curves by a fitting function implemented in R  
28 with the non-linear least square method. Power spectral density of the second derivative  
29 of the density plot was calculated using fast Fourier transform method with R.

30 Stimulated emission depletion (STED) imaging was performed using TCS  
31 SP8 STED 3X microscope (Leica, Wetzlar, Germany) with an objective lens HC PL  
32 APO 93X/1.30 GLYC (Leica). Deconvolution was performed with a deconvolution



1 software package Huygens Professional (version 17.10, Scientific Volume Imaging,  
2 Hilversum, Netherlands).

3 Deconvoluted STED images were used for the analyses of Par3 segment  
4 lengths and widths. The segment length was defined as a shortest length between  
5 terminal ends, corners and/or branching points of Par3 contours, and manually traced  
6 with Fiji. The segment width was given by the full width at half maximum (FWHM) of  
7 a Gaussian-fitted signal distribution orthogonal to each Par3 segment.

8

### 9 **Quantification of asymmetry and statistics**

10 The equatorial z-plane of each cell was analyzed for the estimation of asymmetric index  
11 (ASI) (see also Supplementary Fig. 1b). The cell perimeter was traced by a 0.5  
12  $\mu\text{m}$ -width line and the signal intensity along the line was measured with Fiji. The signal  
13 intensities were summed up along the half (L) of the total perimeter length (2L). The  
14 difference between this value and that of the other half was calculated and normalized  
15 by the total signal intensity along the perimeter. This measurement was done starting  
16 from every pixel along the perimeter (1 pixel = 0.108  $\mu\text{m}$ ). The maximum value of them  
17 was defined as ASI. ASI larger than 0.35 was defined as polarized cell, and the  
18 statistical significance of polarized cell population was analyzed by Fisher's exact  
19 test with post-hoc Bonferroni correction for multiple comparisons (Fig. 3a, and Fig. 5e,  
20 -f). Statistical analyses were performed with R software.

21

### 22 **Western blot analysis**

23 Whole cell extracts of the untransfected S2 cells and the transfected S2 cells were  
24 subjected to SDS-polyacrylamide gel electrophoresis. Primary antibodies used were  
25 anti-Par3 antibody (rabbit polyclonal, used at 1:1000), anti-alpha-tubulin (rat  
26 monoclonal, Santa Cruz). Secondary antibodies used were horseradish peroxidase  
27 (HRP)-conjugated anti-mouse antibody (sheep polyclonal, used at 1:3000, GE  
28 Healthcare), HRP-conjugated anti-rabbit antibody (sheep polyclonal, used at 1:3000,  
29 GE Healthcare) and HRP-conjugated anti-chicken antibody (donkey polyclonal, used at  
30 1:250, SA1-300, Thermo Fisher Scientific). Protein level was analyzed by  
31 chemiluminescence with Chemi-Lumi One L (Nacalai tesque, Kyoto, Japan) and  
32 quantified with an image analyzer LAS-3000 system (Fujifilm, Tokyo, Japan). To  
33 compare the expression level of the overexpressed fluorescent protein per cell between

1 two different transfectants or with the endogenous Par3 proteins, transfection efficiency  
2 for each sample was calculated by counting fluorescence-positive cells and negative  
3 cells. The ratio of the expression level per cell was calculated by dividing the measured  
4 staining intensity on the Western blot by the transfection efficiency.

5

## 6 **Knock-down experiment**

7 Long double-stranded RNAs (dsRNAs) were used for RNA interference (RNAi) in S2  
8 cells as previously described (Bettencourt-Dias & Goshima, 2009). dsRNA for  
9 knocking-down *Par-6* or *aPKC* was synthesized with MEGAscript T7 Transcription Kit  
10 (Ambion, Thermo Fisher Scientific) according to the manufacturer's instructions, by  
11 using *pBS-T7/Par-6/T7* or *pBS-T7/aPKC/T7* plasmid, which contains a full-length ORF  
12 of *Par-6* or *aPKC* flanked by two T7 promoters, as a template, respectively.  
13 dsRNA for knocking-down *Lgl* was by using *pUAS-Flag-Lgl*, and primers in below.

14 Forward:

15 5'-TAATACGACTCACTATAGGGATGGCAATAGGGACGCAAACAGGGGCTTT  
16 AAAAGTT-3', Reverse:

17 5'-AATACGACTCACTATAGGGTTAAAATTGGCTTTCTTCAGGCGCTGTTTTTG  
18 GCGTTCCAA-3'. dsRNAs were added to the culture media at a final concentration of  
19 4.5 µg/ml at 2–3 h following transfection of expression plasmids.

20

## 21 **Plasmid construction**

22 To construct expression vectors under control of an *actin* (*act5c*) promoter, *Drosophila*  
23 *Par6*, *Par3* or *aPKC* ORFs, or *Par6*, *aPKC* and myristoylation tag from *Fyn* (5'-  
24 ATGGGCTGTGTGCAATGTAAGGATAAAGAAGCAACAAACTGACG-3')  
25 conjugated with *GFP* at the C-terminus (*Par-6-GFP* and *aPKC-GFP*) was inserted into  
26 *pAc5.1/V5-His B* plasmid (Invitrogen, Thermo Fisher Scientific). To construct an  
27 expression vector for *Par-3* under control of the *Gal4-UAS* system, *Drosophila gal4*  
28 ORF was inserted into *pDAMCS* plasmid. To construct *pDAMCS* plasmid,  
29 *Bgl II* -*Xho I* fragment of *pAct5C0* plasmid (Thummel *et al*, 1988) containing *actin 5C*  
30 promoter and poly(A) addition signals (and a small region of *hsp70* promoter) was  
31 cloned between *BamH I* and *Sal I* site of *pUC19* plasmid. Then, a synthetic  
32 double-strand oligonucleotide containing multiple cloning sites was cloned into the

1 BamH I site to produce pDAMCS expression plasmid. Par-3 conjugated with *Myc* or  
2 *Flag* epitope and *mKate2* at the N-terminus and C-terminus, respectively, and *Lgt*<sup>3A</sup>  
3 with *Flag* epitope was inserted into *pUAST* plasmid (Brand & Perrimon, 1993). To  
4 construct expression vectors for Par-3 under the control of the induction system, Par-3  
5 that had been conjugated with *Myc* epitope and *mKate2* at the N-terminus and  
6 C-terminus, respectively, was inserted into *pMT* plasmid (Invitrogen, Thermo Fisher  
7 Scientific). pUbq-Spd2-GFP is kindly provided by Jordan Raff (University of Oxford,  
8 UK). Plasmids used for transfection were purified with Wizard Plus SV Minipreps  
9 DNA Purification System (Promega, Madison, WI, USA) or NucleoBond Xtra Midi  
10 (Macherey-Nagel, Düren, Germany).

11

## 12 **Acknowledgements**

13 We thank Y. Tsunekawa for technical advice, J. Raff for plasmids, T. Nishimura for fly  
14 strains, S. Hayashi, T. Nishimura, and K. Kawaguchi for critical discussion. Some of  
15 the imaging experiments were performed at the RIKEN Kobe Light Microscopy Facility.  
16 I.F. is a recipient of RIKEN Special Postdoctoral Researcher Program.

17

## 18 **Contributions**

19 K.K., S.Y., I.F. and F.M. designed the project. K.K. engaged in and performed all the  
20 experiments. K.K, I.F., A.S. and Y.O performed super resolution microscopic  
21 observations. K.K., S.Y., A.S., I.F. and F.M. analyzed data. K.K., I.F., T.S. and F.M.  
22 prepared the manuscript with input from all authors.

## 23 **Conflict of interest**

24 The authors declare no conflict interests.

## 25 **Data availability**

26 All raw data are available upon the request.

1 **References**

2

3 Aceto D, Beers M & Kemphues KJ (2006) Interaction of PAR-6 with CDC-42 is  
4 required for maintenance but not establishment of PAR asymmetry in *C. elegans*.  
5 *Developmental Biology* **299**: 386–397

6 Baas AF, Kuipers J, van der Wel NN, Batlle E, Koerten HK, Peters PJ & Clevers HC  
7 (2004) Complete polarization of single intestinal epithelial cells upon activation of  
8 LKB1 by STRAD. *Cell* **116**: 457–466

9 Benton DSJR (2003) A Conserved Oligomerization Domain in *Drosophila*  
10 Bazooka/PAR-3 Is Important for Apical Localization and Epithelial Polarity. **13**:  
11 1317–1323

12 Betschinger J, Mechtler K & Knoblich JA (2003) The Par complex directs asymmetric  
13 cell division by phosphorylating the cytoskeletal protein Lgl. *Nature* **422**: 326–330

14 Bettencourt-Dias M & Goshima G (2009) RNAi in *Drosophila* S2 cells as a tool for  
15 studying cell cycle progression. *Methods Mol. Biol.* **545**: 39–62

16 Brand AH & Perrimon N (1993) Targeted gene expression as a means of altering cell  
17 fates and generating dominant phenotypes. *Development* **118**: 401–415

18 Chau AH, Walter JM, Gerardin J, Tang C & Lim WA (2012) Designing synthetic  
19 regulatory networks capable of self-organizing cell polarization. *Cell* **151**: 320–332

20 Derivery E, Seum C, Daeden A, Loubéry S, Holtzer L, Jülicher F & Gonzalez-Gaitan M  
21 (2015) Polarized endosome dynamics by spindle asymmetry during asymmetric cell  
22 division. *Nature* **528**: 280–285

23 Dickinson DJ, Schwager F, Pintard L, Gotta M & Goldstein B (2017) A Single-Cell  
24 Biochemistry Approach Reveals PAR Complex Dynamics during Cell Polarization.  
25 *Developmental Cell* **42**: 416–434.e11

- 1 Doerflinger H, Benton R, Torres IL, Zwart MF & St Johnston D (2006) *Drosophila*  
2 anterior-posterior polarity requires actin-dependent PAR-1 recruitment to the  
3 oocyte posterior. *Current Biology* **16**: 1090–1095
- 4 Feng W, Wu H, Chan LN & Zhang M (2007) The Par-3 NTD adopts a PB1-like  
5 structure required for Par-3 oligomerization and membrane localization. *The EMBO*  
6 *Journal* **26**: 2786–2796 Available at:  
7 <http://emboj.embopress.org/content/26/11/2786.abstract>
- 8 Goehring NW, Trong PK, Bois JS, Chowdhury D & Grill SW (2011) Polarization of  
9 PAR Proteins by Advective Triggering of a Pattern-Forming System. *Science* **403**:
- 10 Guo S & Kemphues KJ (1995) par- 1, a Gene Required for Establishing Polarity in *C* .  
11 *elegans* Embryos , Encodes a Putative Ser / Thr Kinase That Is Asymmetrically  
12 Distributed. *Cell* **81**: 611–620
- 13 Gustafsson N, Culley S, Ashdown G, Owen DM, Pereira PM & Henriques R (2016)  
14 Fast live-cell conventional fluorophore nanoscopy with ImageJ through  
15 super-resolution radial fluctuations. *Nature Communications* **7**: 12471
- 16 Harris TJC (2017) Protein clustering for cell polarity: Par-3 as a paradigm. *FI000Res* **6**:  
17 1620
- 18 Hurov JB, Watkins JL & Piwnicka-Worms H (2004) Atypical PKC phosphorylates  
19 PAR-1 kinases to regulate localization and activity. *Current Biology* **14**: 736–741
- 20 Hyman AA, Weber CA & Jülicher F (2014) Liquid-Liquid Phase Separation in Biology.  
21 *Annu. Rev. Cell Dev. Biol.* **30**: 39–58
- 22 Ikeshima-Kataoka H, Skeath JB, Nabeshima Y-I, Doe CQ & Matsuzaki F (1997)  
23 Miranda directs Prospero to a daughter cell during *Drosophila* asymmetric divisions.  
24 *Nature* **390**: 625–629
- 25 Izumi Y, Hirose T, Tamai Y, Hirai S, Nagashima Y, Fujimoto T, Tabuse Y, Kemphues  
26 KJ & Ohno S (1998) An atypical PKC directly associates and colocalizes at the

- 1 epithelial tight junction with ASIP, a mammalian homologue of *Caenorhabditis*  
2 *elegans* polarity protein PAR-3. *J Cell Biol* **143**: 95–106
- 3 Izumi Y, Ohta N, Itoh-Furuya A, Fuse N & Matsuzaki F (2004) Differential functions  
4 of G protein and Baz-aPKC signaling pathways in *Drosophila* neuroblast  
5 asymmetric division. *J Cell Biol* **164**: 729–738
- 6 Januschke J & Gonzalez C (2010) The interphase microtubule aster is a determinant of  
7 asymmetric division orientation in *Drosophila* neuroblasts. *The Journal of cell*  
8 *biology* **188**: 693–706
- 9 Jiang T, McKinley RFA, McGill MA, Angers S & Harris TJC (2015) A  
10 Par-1-Par-3-Centrosome Cell Polarity Pathway and Its Tuning for Isotropic Cell  
11 Adhesion. *Current Biology* **25**: 2701–2708
- 12 Joberty G, Petersen C, Gao L & Macara IG (2000) The cell-polarity protein Par6 links  
13 Par3 and atypical protein kinase C to Cdc42. *Nat Cell Biol* **2**: 531–539
- 14 John K & Bär M (2005) Travelling lipid domains in a dynamic model for  
15 protein-induced pattern formation in biomembranes. *Phys Biol* **2**: 123–132
- 16 Johnston CA, Hirono K, Prehoda KE & Doe CQ (2009) Identification of an  
17 Aurora-A/PinsLINKER/ Dlg Spindle Orientation Pathway using Induced Cell  
18 Polarity in S2 Cells. *Cell* **138**: 1150–1163
- 19 Johnston DS (2018) Establishing and transducing cell polarity: common themes and  
20 variations. *Current Opinion in Cell Biology* **51**: 33–41
- 21 Kempfues KJ, Priess JR, Morton DG & Cheng NS (1988) Identification of genes  
22 required for cytoplasmic localization in early *C. elegans* embryos. *Cell* **52**: 311–320
- 23 Krahn MP, Klopfenstein DR, Fischer N & Wodarz A (2010) Membrane Targeting of  
24 Bazooka/PAR-3 Is Mediated by Direct Binding to Phosphoinositide Lipids. *Current*  
25 *Biology* **20**: 636–642
- 26 Lang CF & Munro E (2017) The PAR proteins: from molecular circuits to dynamic  
27 self-stabilizing cell polarity. *Development* **144**: 3405–3416

- 1 Loyer N & Januschke J (2018) The last-born daughter cell contributes to division  
2 orientation of *Drosophila* larval neuroblasts. *Nature Communications* **9**: 1–12
- 3 Mizuno K, Suzuki A, Hirose T, Kitamura K, Kutsuzawa K, Futaki M, Amano Y &  
4 Ohno S (2003) Self-association of PAR-3-mediated by the conserved N-terminal  
5 domain contributes to the development of epithelial tight junctions. *J. Biol. Chem.*  
6 **278**: 31240–31250
- 7 Morais-de-Sá E, Mirouse V & St Johnston D (2010) aPKC Phosphorylation of Bazooka  
8 Defines the Apical/Lateral Border in *Drosophila* Epithelial Cells. *Cell* **141**: 509–  
9 523
- 10 Motegi F & Sugimoto A (2006) Sequential functioning of the ECT-2 RhoGEF, RHO-1  
11 and CDC-42 establishes cell polarity in *Caenorhabditis elegans* embryos. *Nat Cell*  
12 *Biol* **8**: 978–985
- 13 Munro E, Nance J & Priess JR (2004) Cortical flows powered by asymmetrical  
14 contraction transport PAR proteins to establish and maintain anterior-posterior  
15 polarity in the early *C. elegans* embryo. *Developmental Cell* **7**: 413–424
- 16 Ohshiro T, Yagami T, Zhang C & Matsuzaki F (2000) Role of cortical  
17 tumour-suppressor proteins in asymmetric division of *Drosophila* neuroblast.  
18 *Nature* **408**: 593–596
- 19 Plant PJ, Fawcett JP, Lin DCC, Holdorf AD, Binns K, Kulkarni S & Pawson T (2003)  
20 A polarity complex of mPar-6 and atypical PKC binds, phosphorylates and  
21 regulates mammalian Lgl. *Nat Cell Biol* **5**: 301–308
- 22 Renschler FA, Bruekner SR, Salomon PL, Mukherjee A, Kullmann L,  
23 Schütz-Stoffregen MC, Henzler C, Pawson T, Krahn MP & Wiesner S (2018)  
24 Structural basis for the interaction between the cell polarity proteins Par3 and Par6.  
25 *Sci. Signal.* **11**: eaam9899
- 26 Rodriguez J, Peglion F, Martin J, Hubatsch L, Reich J, Hirani N, Gubieda AG, Roffey J,  
27 Fernandes AR, St Johnston D, Ahringer J & Goehring NW (2017) aPKC Cycles

- 1        between Functionally Distinct PAR Protein Assemblies to Drive Cell Polarity.  
2        *Developmental Cell*: 1–16
- 3        Rodriguez-Boulan E & Macara IG (2014) Organization and execution of the epithelial  
4        polarity programme. *Nat Rev Mol Cell Biol* **15**: 225–242
- 5        Sailer A, Anneken A, Li Y, Lee S & Munro E (2015) Dynamic Opposition of Clustered  
6        Proteins Stabilizes Cortical Polarity in the *C. elegans* Zygote. *Developmental Cell*  
7        **35**: 131–142
- 8        Schneider I (1972) Cell lines derived from late embryonic stages of *Drosophila*  
9        melanogaster. *J Embryol Exp Morphol* **27**: 353–365
- 10       Soriano EV, Ivanova ME, Fletcher G, Riou P, Knowles PP, Barnouin K, Purkiss A,  
11       Kostecky B, Saiu P, Linch M, Elbediwy A, Kjær S, O’Reilly N, Snijders AP,  
12       Parker PJ, Thompson BJ & McDonald NQ (2016) aPKC Inhibition by Par3 CR3  
13       Flanking Regions Controls Substrate Access and Underpins Apical-Junctional  
14       Polarization. *Developmental Cell* **38**: 384–398
- 15       Suzuki A & Ohno S (2006) The PAR-aPKC system: lessons in polarity. *Journal of Cell*  
16       *Science* **119**: 979–987
- 17       Tabuse Y, Izumi Y, Piano F, Kemphues KJ, Miwa J & Ohno S (1998) Atypical protein  
18       kinase C cooperates with PAR-3 to establish embryonic polarity in *Caenorhabditis*  
19       *elegans*. *Development (Cambridge, England)* **125**: 3607–3614
- 20       Thummel CS, Boulet AM & Lipshitz HD (1988) Vectors for *Drosophila*  
21       P-element-mediated transformation and tissue culture transfection. *Gene* **74**: 445–  
22       456
- 23       Wang S-C, Yu T, Low F, Nishimura Y, Gole L, Yu W & Motegi F (2017) Cortical  
24       forces and CDC-42 control clustering of PAR proteins for *Caenorhabditis elegans*  
25       embryonic polarization. **19**:
- 26       Yamanaka T, Horikoshi Y, Sugiyama Y, Ishiyama C, Suzuki A, Hirose T, Iwamatsu A,  
27       Shinohara A & Ohno S (2003) Mammalian Lgl Forms a Protein Complex with



- 1        PAR-6 and aPKC Independently of PAR-3 to Regulate Epithelial Cell Polarity.
- 2        *Current Biology* **13**: 734–743
  
- 3        Yamashita YM, Yuan H, Cheng J & Hunt AJ (2010) Polarity in Stem Cell Division :
- 4        Asymmetric Stem Cell Division in Tissue Homeostasis. : 1–14
  
- 5        Zhang Y, Wang W, Chen J, Zhang K, Gao F, Gao B, Zhang S, Dong M, Besenbacher F,
- 6        Gong W, Zhang M, Sun F & Feng W (2013) Structural Insights into the Intrinsic
- 7        Self-Assembly of Par-3 N-Terminal Domain. *Structure* **21**: 997–1006

1 **Figure Legends**

2 **Figure 1. S2 cells polarize due to elevated Par3 expression.**

- 3 **a.** Immunostaining of endogenous aPKC, Par6, and Par3 in S2 cells two days following  
4 transfection of the empty vector. Blue indicates DAPI staining. Images in a-i were at the  
5 equatorial plane of cells. Scale bar, 5  $\mu$ m in all panels in this figure.
- 6 **b.** Live-imaging of Par6-GFP in S2 cells (top), two days following transfection of a  
7 combination of expression plasmids as described in the table (bottom).
- 8 **c.** Localization of endogenous aPKC and Par6 in cells overexpressing myc-Par3,  
9 stained with anti-myc-tag and anti-aPKC or anti-Par6 antibodies, and with DAPI, two  
10 days after transfection. Arrows indicate co-localized Par components.
- 11 **d.** Live-imaging of Par6-GFP (left) or aPKC-GFP (right) in Par3-overexpressing cells  
12 containing aPKC or Par6 RNAi knockdown, respectively, at two days post-transfection.
- 13 **e.** Endogenous expression of Lgl in S2 cells stained with anti-Lgl and DAPI at two days  
14 post-transfection of the empty vector.
- 15 **f.** Par3 and endogenous Lgl localize complementarily in 71% of cells (n=24) where  
16 overexpressed Par3 was asymmetrically localized. Arrow, Par3 crescent. Arrowhead,  
17 Lgl.
- 18 **g.** Live-imaging of myc-Par3-mKates without (left) or with (right) Lgl knockdown by  
19 RNAi at two days post-transfection.
- 20 **h.** S2 cells over-expressing flag-Par3 and myc-Lgl3A, stained with anti-flag-tag,  
21 anti-myc-tag and DAPI. Lgl3A was cortically uniform in contrast to cytoplasmic Par3  
22 distribution.
- 23 **i.** 3-D reconstructed image of a cell overexpressing myc-Par3-mKate2 (left). In the  
24 right side image, brightness and contrast were adjusted to visualize the outline of the  
25 same cell. The movie of a different cell is shown as Supplementary movie 1.

1 **Figure 2. Temporal pattern of Par complex clustering**  
2 **a, b.** Time-lapse images of S2 cells inducing Par3-mKate2 expression via the  
3 *Metallothionein* promoter, leading to polarized (**a**) or non-polarized (**b**) Par3  
4 distribution. Time 0 (h: min) was at the time of induction by CuSO<sub>4</sub> addition in these  
5 and subsequent panels. The top row shows images at the equatorial plane. The middle  
6 and bottom rows show the max intensity projection images of the upper and lower  
7 hemispheres of the cell, respectively. Scale bar, 5 μm.  
8 **c.** Time-lapse images of Par6-GFP showing the emergence and development of  
9 Par-dots. The images are 6 μm max intensity projection covering the entire cell. Scale  
10 bar, 5 μm.  
11 **d.** Time-lapse imaging of Par6-GFP showing the fusion and fission of Par-dots  
12 (arrowheads in the upper panel), and the growth of a Par-dot (arrowheads in the lower  
13 panel). In **d** and **e**, scale bar, 1 μm.  
14 **e.** Time-lapse image of Par-islands visualized by Par6-GFP. Arrowheads indicate  
15 dynamic shape changes, fusion (arrowheads, upper panel) and the dissociation of  
16 Par-islands (arrowheads, lower panel).  
17 **f.** Schematic presentation of S2 cell polarization process from Par-dot formation to  
18 clustering of Par-islands.  
19 **g.** Localization of the Par3-GFP in a mitotic neuroblast of a *Drosophila* brain  
20 expressing *Par3-GFP*. A brain taken from a 3<sup>rd</sup> instar larvae and stained for GFP and  
21 Miranda(Ikeshima-Kataoka *et al*, 1997). A single plane near the apical surface (left), A  
22 max-intensity projected image of the whole cell (center) and merged (right) image are  
23 shown. Par-island like structures are observed (arrows). Scale bar, 5 μm.

1 **Figure 3. Steady state dynamics of polarized Par complex**

- 2 **a.** The distribution of ASI among cells with memGFP (left) driven by the *Act5C*  
3 promoter and Par-3-mKate2 (right) induced MT promoter. ASI was measured for the  
4 equatorial plane of cells 8 h after CuSO<sub>4</sub> addition. The mean ASI value was 0.16±0.07  
5 (s.d.) for cells expressing memGFP (n = 117 cells), and 0.27±0.15 (s.d.) for cells  
6 localizing Par3-mKate2 along the cell cortex (n=182 cells). Cells showing ASI in the  
7 range outside the ASI distribution for memGFP expressing cells (ASI>0.35) were 27.4 %  
8 of the cells with cortical Par3-mKate2. Mean ASI value for those cells was 0.43±0.12  
9 (s.d.). In all figures and the main text, s.d. is shown following the mean value.
- 10 **b.** Time-lapse imaging of Par-islands at the steady state, taken 8 h after CuSO<sub>4</sub> addition  
11 and onwards.
- 12 **c and d.** 3D images of the distribution of myc-Par3-mKate2 and endogenous Lgl in cells  
13 showing polarized (**c**) and non-polarized (**d**) Par3 localization. The distribution of Lgl  
14 and myc-Par3-mKate2 is essentially non-overlapped in both cases. See Supplementary  
15 movie 4 for the 3D-rotation movies.
- 16 **e.** Time-lapse imaging of Par3 distribution during mitosis. Time indicates h:min after  
17 CuSO<sub>4</sub> addition. Images of equatorial plane (upper panels), and the max projection of the  
18 whole cell (lower panels) are shown. Scale bar, 5 μm.

1 **Figure 4. SRRF-processed confocal images and STED microscopy reveals a**  
2 **unit-like segment in Par-islands.**  
3 **a and b.** SRRF-processed confocal images of cells expressing both Par3-mKate2 (**a**)  
4 and Par6-GFP (**b**). Scale bar, 10  $\mu\text{m}$ .  
5 **c.** Histogram of the distribution of contour lengths along the meshwork in Par-islands  
6 visualized by Par3-mKate2. Cells were transfected with pMT-Par3-mKate2 and  
7 pAct-Par6-GFP, and treated with  $\text{CuSO}_4$  as described above. The contour lengths were  
8 measured following edge detection processing of SRRF-processed images (see  
9 Supplementary Fig. 3a and Methods for actual measurements).  
10 **d.** Gaussian fitting of the density plot (**c**). The density plot of the histogram (**c**) was  
11 fitted with 7 Gaussian curves via the least square method. Parameters of individual  
12 Gaussian curves are shown in Supplementary Fig. 3b. The averaged mean of individual  
13 Gaussian curves was  $0.38 \pm 0.062 \mu\text{m}$  for 754 contours from 28 cells.  
14 **e.** Power spectral density for the second derivative of the contour distribution plot  
15 shown in (**c**). The major frequency was  $2.4 \mu\text{m}^{-1}$ .  
16 **f and g.** Deconvoluted super-resolution (STED) images of cells expressing  
17 myc-Par3-GFP (**e**) and Par6-GFP (**f**), stained for GFP. S2-cells were transfected with  
18 pMT-myc-Par3-GFP and pAct-Par6 (**e**) or with pMT-myc-Par3 and pAct-Par6-GFP (**f**),  
19 followed by  $\text{CuSO}_4$  addition for induction two days following transfection. Cells were  
20 fixed for immune-staining for GFP at 8 h post-induction. Scale bar, 10  $\mu\text{m}$ .  
21 **h.** Magnified views of the left cell in (**e**). Scale bar, 0.5  $\mu\text{m}$ .  
22 **i.** Distribution of the length of individual segments constructing Par-islands visualized  
23 by Par3-GFP and Gaussian fitting. See Supplementary Fig. 3c-f for measurements. The  
24 mean value of the single segment lengths was  $0.39 \pm 0.09 \mu\text{m}$  based on 194 segments  
25 from 2 STED images for 2 cells (**a**).

1 **Figure 5. Role of functional domains of the core Par complex.**

2 **a.** Schematic representation of the functional domains of Par3 and their corresponding  
3 mutant constructs used in this study.

4 **b-d.** Time-lapse imaging of the distribution of Par6-GFP in cells where Par3 $^{\Delta}$   
5  $^{CR1}$ -mKate2 (**b**), Par3 $^{S980A}$ -mKate2 (**c**) and Par3 $^{\Delta MAR}$ -mKate2 were induced by the  
6 *Metallothionein* promoter. Time is indicated in h:min after CuSO<sub>4</sub> addition. In (**b**) and  
7 (**c**), images at the equatorial plane (top panels), and stacked images of the upper  
8 hemisphere (middle panels), and the lower hemisphere (bottom panels) are shown. In  
9 (**d**), the lower panels show maximum-projection images of the whole cell. Scale bar, 5  
10  $\mu$ m.

11 **e and f.** The distribution of ASI is shown for cells that have induced Par3 $^{\Delta CR1}$ -mKate2 (**e**,  
12 the mean value =  $0.19 \pm 0.10$  for  $n = 83$  cells), and Par3 $^{S980A}$ -mKate2 (**f**, the mean value =  
13  $0.37 \pm 0.20$  for  $n = 53$  cells). The gray part of histograms indicates the fraction of cells  
14 having ASI in the range out of the ASI distribution for memGFP-expressing cells (ASI >  
15 0.35, see Supplementary Fig. 1c, and Fig. 3a). Cells in this range are 8.4 % of cells with  
16 cortical Par3 $^{\Delta CR1}$ -mKate2 (mean ASI value =  $0.41 \pm 0.06$ ) and 49.0% for  
17 Par3 $^{S980A}$ -mKate2 (mean ASI value =  $0.54 \pm 0.14$ ). In both cases, the polarized cell  
18 population (ASI > 0.35) is significantly altered ( $p = 0.0006$  for Par-3 $^{\Delta CR1}$ -mKate2 and  
19  $p = 0.0088$  for Par-3 $^{S980A}$ -mKate2) compared with that of wild type Par3-mKate2 (Fig.  
20 3a). Quantification was performed 8 h after CuSO<sub>4</sub> addition onwards. In all images,  
21 CuSO<sub>4</sub> was added at two days post-transfection.

22 **g.** Time-lapse imaging of the effects of actin disruption on the Par-islands. At 8h after  
23 Par3-mKate2 induction, cells were treated with Latrunculin B. Par-islands rapidly  
24 became round and/or promoted membrane protrusion. Faint fluorescent islands face the  
25 bottom of the dish. See Supplementary movie 6. Scale bar, 5  $\mu$ m.

26

27

1 **Supplementary Figure legends**

2

3 **Supplementary Fig. 1. Par-polarity induction by the Gal4>UAS-Par3**

- 4 **a.** Comparison of the expression level of Par3-GFP driven by the *actin* promoter with  
5 that driven by the *actin*-promoter-*Gal4* x *UAS* system. Western blotting was performed  
6 for S2 cells transfected with *pAct-Par3-GFP* (100  $\mu$ g and 300  $\mu$ g /10<sup>6</sup> cells) and with  
7 *pAct-Gal4* and *pUAS-Par3-GFP*, and the blot was stained with the anti-Par3 antibody.
- 8 **b.** Definition of the asymmetric index (ASI). ASI is defined by the maximum  
9 difference in the cumulative intensity of fluorescence (such as Par3-mKate2 and  
10 Par6-GFP) between a half cell perimeter and the other half at the equatorial plane of the  
11 cell, normalized via dividing by the cumulative intensity of the entire cell perimeter.
- 12 **c.** ASI distribution was compared between cells expressing memGFP and those  
13 expressing Par3-mKate2 at the cell cortex, both of which were driven by the  
14 Act-Gal4xUAS system. ASI value of memGFP is distributed broadly and ranges from 0  
15 to 0.35 (mean value = 0.14 $\pm$ 0.08). Since memGFP, in principle, has no ability to  
16 polarize, such a wide distribution originated from the fluctuation of random distribution  
17 along the equatorial cell perimeter and also from the existence of local membrane flairs.  
18 Distribution of ASI for cells showing cortical Par3 distribution (mean = 0.34 $\pm$ 0.18) may  
19 be categorized into 2 groups (Fig. 2C); a group of cells show low ASIs overlapping with  
20 those of cells expressing memGFP in the range from 0 to 0.35 (approximately 62% of  
21 the transfected cells that localize mKate2 cortically), indicating that cells belonging to  
22 this group are essentially non-polarized. The ASI values of the other group  
23 (approximately 38%), are broadly distribute, but display ASI values larger than the ASI  
24 distribution of mem-GFP cells (> 0.35, mean value = 0.52 $\pm$ 0.14)

1 **Supplementary Fig. 2. Temporal pattern and steady state of the clustering of**  
2 **Par-islands**

3 **a.** Temporal pattern of the fluorescence intensity of Par6-GFP expressed in S2 cells  
4 transfected with *pAct-Par6-GFP*. The fluorescence intensity of Par6-GFP was measured  
5 for 6 cells every 1 h from two days following transfection. Expression levels did not  
6 drastically change from 6 h onward following transfection, indicating that Par6-GFP is  
7 an appropriate marker for the Par complex distribution in cells, when Par3-mKate2 was  
8 induced.

9 **b-d.** Temporal pattern of the fluorescence intensity of Par3-mKate2 (**b**), its rate of  
10 change (**c**) and the ratio of Par6-GFP/Par3-mKate2 (**d**), and the ASI value (**e**) of S2 cells  
11 that were transfected with *pMT-Par3-mKate2* and *pAct-Par6-GFP*, followed by  
12 induction by CuSO<sub>4</sub> addition two days after plasmid transfection. Time 0 is the timing  
13 of CuSO<sub>4</sub> addition (two days following plasmid transfection). Measurements were  
14 taken every 30 min. Fluorescence intensity reached the steady level around 8 h after  
15 induction (**b,e**). In (**b-e**), the blue line indicates the averaged values of 10 cells that  
16 showed a non-polarized distribution of Par6-GFP at 8 h after induction (with the ASI  
17 value around 0.2). The red line indicates the average values of 13 cells that showed  
18 polarized distribution of Par6-GFP following 8 h induction (with the ASI value around  
19 0.4). Bars indicate s.d. **b-d.** The temporal pattern of the fluorescence intensity/cell of  
20 Par3-mKate2 and Par6-GFP/Par3-mKate2 ratio are not significantly different between  
21 the polarized cell group (red line) and non-polarized cell group (blue line). **e.** ASI value  
22 began to increase immediately after the rise of Par3-mKate2 levels (approximately 2 h  
23 after induction) in the polarized cells (blue line), and maintained a high level afterwards.  
24 On the other hand, the non-polarized cells (red line) initially showed a slight increase in  
25 the ASI value, but decreased from 5 h after induction onwards. The timing of the  
26 increase in ASI roughly corresponded to that of Par-dot emergence (2-4 h after  
27 induction; see Fig. 2a-c), and the timing of a decrease in ASI value in non-polarized  
28 cells roughly corresponds to the late period of Par-island formation (4-6 h after



1 induction), although there are cell to cell variations in these timings. *t* test,  $P = 5.6 \times 10^{-5}$ ,  
2 0.04,  $5.5 \times 10^{-4}$ ,  $1.1 \times 10^{-6}$ ,  $5.5 \times 10^{-4}$ , and  $4.3 \times 10^{-7}$  for every 30 min time point from 6 h  
3 after induction.

4 **f.** Comparison of Par3-mKate2 expression level induced by the *Metallothionein*  
5 promoter, *pMT-Par3-mKate2*, and that promoted by the *pAct-Gal4xUAS* system. The  
6 mKate2 fluorescence intensity of the individual S2 cells was measured two days after  
7 transfection of *pAct-Gal4* and *UAS-Par3-mKate2*, or at 8 h post CuSO<sub>4</sub> induction of  
8 *pMT-Par3-mKate2*, two days after transfection of the plasmid. The expression level of  
9 Par3-mKate2 per cell was approximately 18-fold higher when it was driven by the  
10 *UAS-Gal4* system ( $6.1 \times 10^4 \pm 7.1 \times 10^4$ ) than that of the steady state level induced by the  
11 *Metallothionein* promoter ( $3.4 \times 10^3 \pm 9.8 \times 10^2$ ).

12 **g.** Stability of polarized and non-polarized cells. ASI values 11 h post-induction were  
13 measured for cells polarized 8 h post-induction (ASI > 0.4, n=11) and for non-polarized  
14 cells (ASI < 0.3, n=14). ASI values were measured using induced -Par6-GFP.

15 **h-j.** Relationship between the Par-complex crescent and the position of the centrosome.  
16 The centrosome was visualized via Spd-GFP, which was expressed by the transfection  
17 of *pUbq-Spd-GFP* and *pDA-Gal4* together with *pUAS-Par3*. Spd2-GFP and aPKC were  
18 immunostained (**h**). The angle between the radial lines from the cell center to 2 edges of  
19 the aPKC crescent ( $\theta_1$ ), and the angle between an edge of the crescent and the  
20 centrosome ( $\theta_2$ ) in the clock-wise direction were measured at the equatorial plane (**i**). In  
21 20 out of 27 cells (74%), the centrosome was located within the fan shape made by the  
22 aPKC crescent and the cell center (**j**).

23

24

1 **Supplementary Fig. 3. SRRF analysis of Par-island meshwork**

- 2 **a.** Left. the average of 200 confocal images of Par3-mKate2 distribution in a cell that  
3 expresses Par3-mKate2 and Par6-GFP. Those 200 images were used for SRRF analysis  
4 (Fig. 4a). The middle Panel shows the SRRF-processed image of Fig. 4a, which was  
5 processed with edge detection (see Methods). By this process, the continuous contours  
6 become clearly visible. Edges in the image were visualized in green. The right panel  
7 shows tracing of continuous contours of the SRRF-processed image (Fig. 4a) after edge  
8 detection (light blue lines). The distribution of the lengths of the continuous lines is  
9 shown as a histogram in Fig. 4c. Scale bar, 5  $\mu\text{m}$ .
- 10 **b.** The list of means and s.d., of 7 Gaussian curve (Fig. 4d), combinations that best fit  
11 the density plot of the continuous contour lengths distribution shown in Fig. 4d (see  
12 Methods).

1 **Supplementary Fig. 4 STED analysis of Par-island meshwork**

- 2 **a.** STED image of a cell that expresses Par3-GFP. The distribution of GFP was  
3 detected via indirect immunofluorescence staining. The image on the left in Fig. 4e  
4 shows the deconvolved image (see Methods). Scale bar, 10  $\mu\text{m}$  for **(a-d)**.
- 5 **b.** Individual segments composing Par-islands were traced in the image **(a)** after  
6 deconvolution (Fig. 4e). Tracing of the segments is indicated as light blue straight lines.
- 7 **c.** STED image of a cell expressing Par3-GFP. The deconvolution of the original  
8 image is shown on the right in Fig. 4e.
- 9 **d.** Tracing of individual segments of Par-islands in the right-side image of Fig. 4e.  
10 The lengths of segmental rods detected in these 2 images **(b,d)** are plotted in Fig. 4h.
- 11 **e.** Distribution of half widths of segments composing Par-islands that were visualized  
12 by GFP staining in the two cells shown in Fig. 4a. The mean is  $0.22 \pm 0.03 \mu\text{m}$  ( $n=19$ ).
- 13 **f.** An example of Gaussian fitting of the fluorescence intensity distribution along the  
14 segment width visualized via immunofluorescence-staining for GFP (half width= $0.24$   
15  $\mu\text{m}$ ).
- 16 **g.** Rod and string structures of the Par3-mKate2 in 3D time-lapse images of a cell  
17 expressing Par3-mKate2 during the period of Par-dot formation and development. Four  
18 time points were selected from Supplementary movie 2. Scale bar, 2  $\mu\text{m}$ . Insets display  
19 the magnification of a part of the image. Arrowheads indicate Par-dots, arrows, rods,  
20 and strings. Scale bar, 0.5  $\mu\text{m}$ .

1 **Supplementary Fig. 5. Comparison of Par3 expression level**

2 Comparison of expression levels between Par3 induced by the *MT* promoter and  
3 endogenous Par3 determined via Western blotting. S2 cells were transfected with  
4 *pMT-myc-Par3-mKate2*, and induced for 8 h using CuSO<sub>4</sub> from two days  
5 post-transfection for Western blotting. Left lane: 8 h-induction of myc-Par3-mKate2 by  
6 the *MT* promoter, right lane: not transfected with *pMT-myc-Par3-mKate2*.

1 **List of movies**

2

3 Movie 1: 3D time-lapse movie of a polarized S2 cell monitored by Par6-GFP two days  
4 after transfection of pAct-Gal4 > UAS-myc-Par3-mKate2, pAct-Par6-GFP, and  
5 pAct-aPKC. Par-islands are clustered with dynamic movements.

6

7 Movie 2: 3D time-lapse movie of a S2 cell monitored by Par6-GFP following induction  
8 of myc-Par3-mKate2 from *Metallothionein* promoter. Induction started at time 0 by the  
9 addition of CuSO<sub>4</sub> two days after transfection of pMT-myc-Par3-mKate2,  
10 pAct-Par6-GFP, and pAct-aPKC.

11

12 Movie 3: 3D time-lapse movie of a polarized S2 cell monitored by Par6-GFP at 8 h  
13 induction of myc-Par3-mKate2 with the co-expression of pAct-Par6-GFP and  
14 pAct-aPKC.

15

16 Movie 4: 3D movie of a polarized S2 cell stained for myc-Par3-mKate2 and Lgl at 8 h  
17 induction of myc-Par3-mKate2 with the co-expression of pAct-Par6-GFP and  
18 pAct-aPKC.

19

20 Movie 5: 3D movie of a nonpolarized S2 cell stained for myc-Par3-mKate2 and Lgl at 8  
21 h induction of myc-Par3-mKate2 with the co-expression of pAct-Par6-GFP and  
22 pAct-aPKC. A part of the adjacent cell is included in the movie.

23

24 Movie 6: 3D time-lapse movie of a S2 cell monitored by Par6-GFP, 3 min after the  
25 addition of Latrunculin B, at 8 h induction of myc-Par3-mKate2, following two days  
26 transfection of pMT-myc-Par3-mKate2, pAct-Par6-GFP, and pAct-aPKC.

## Fig. 1

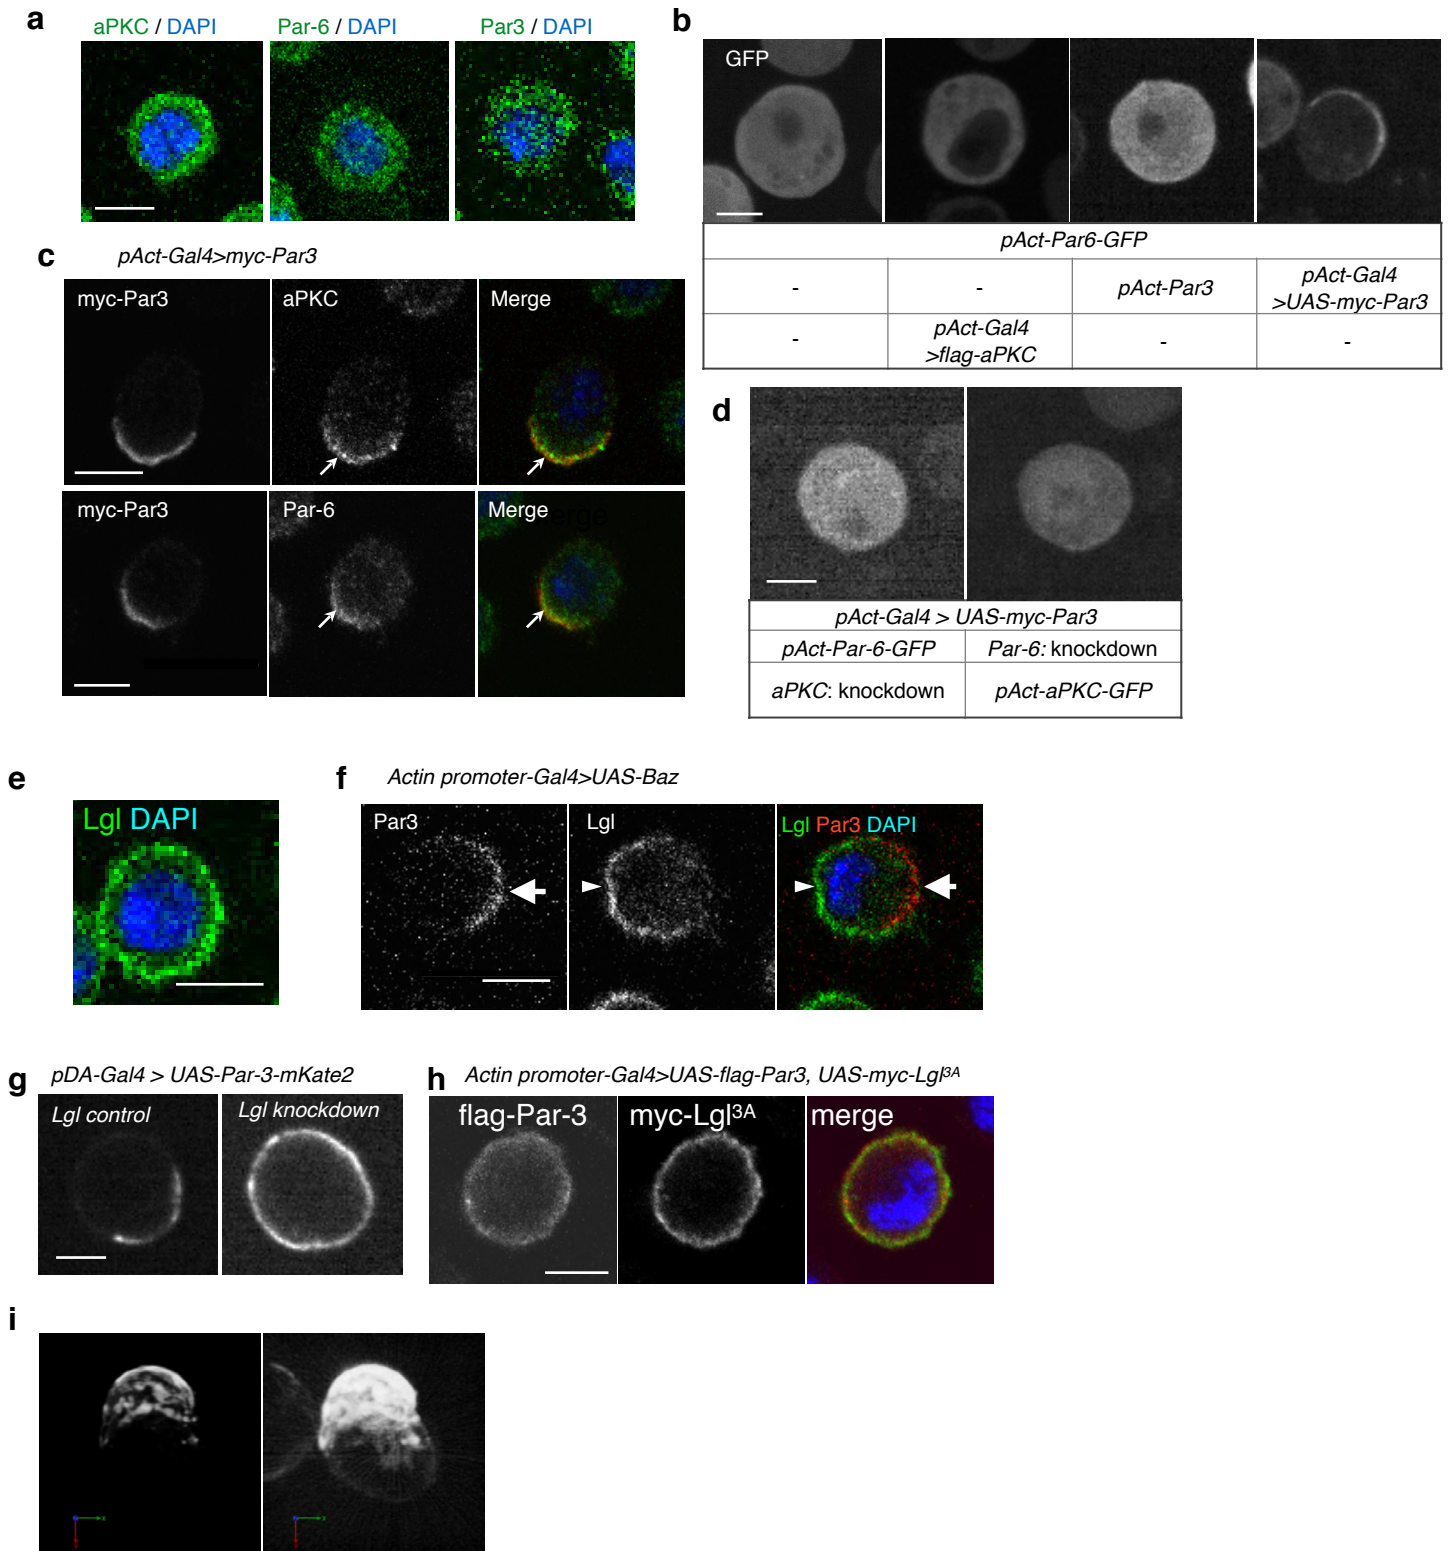

## Fig. 2

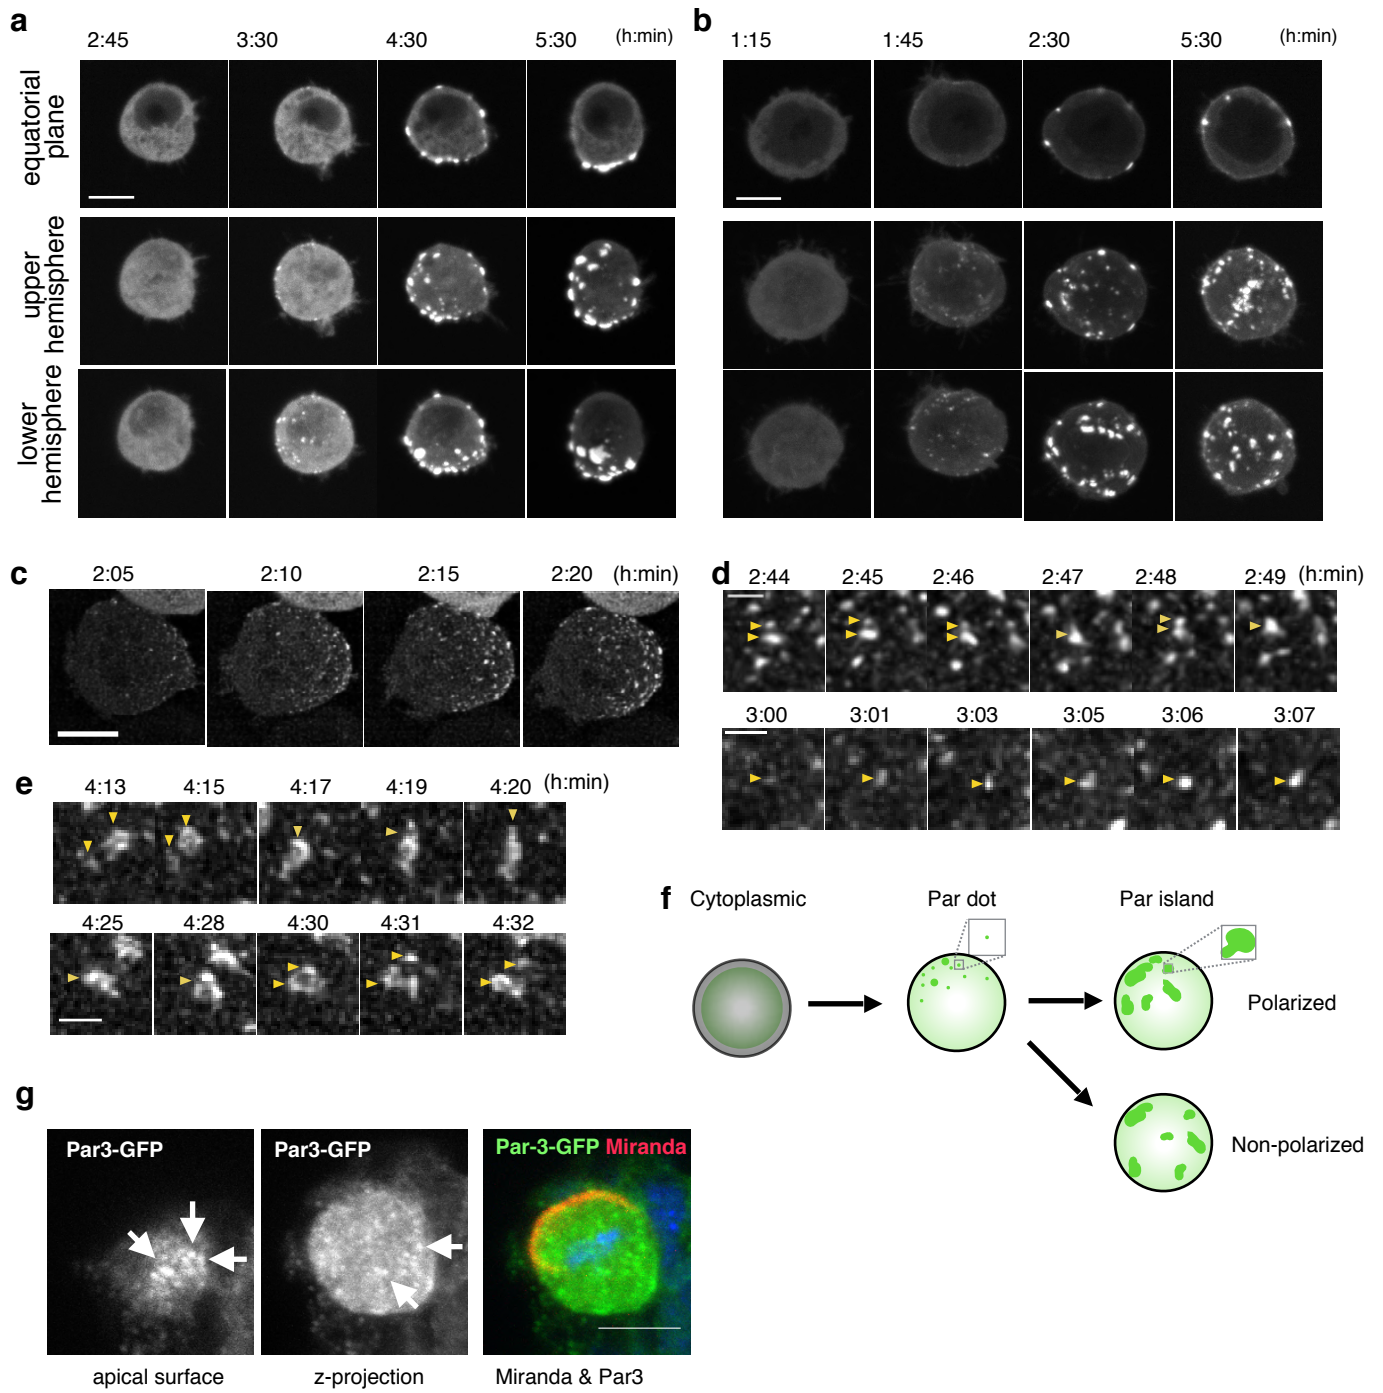

### Fig. 3

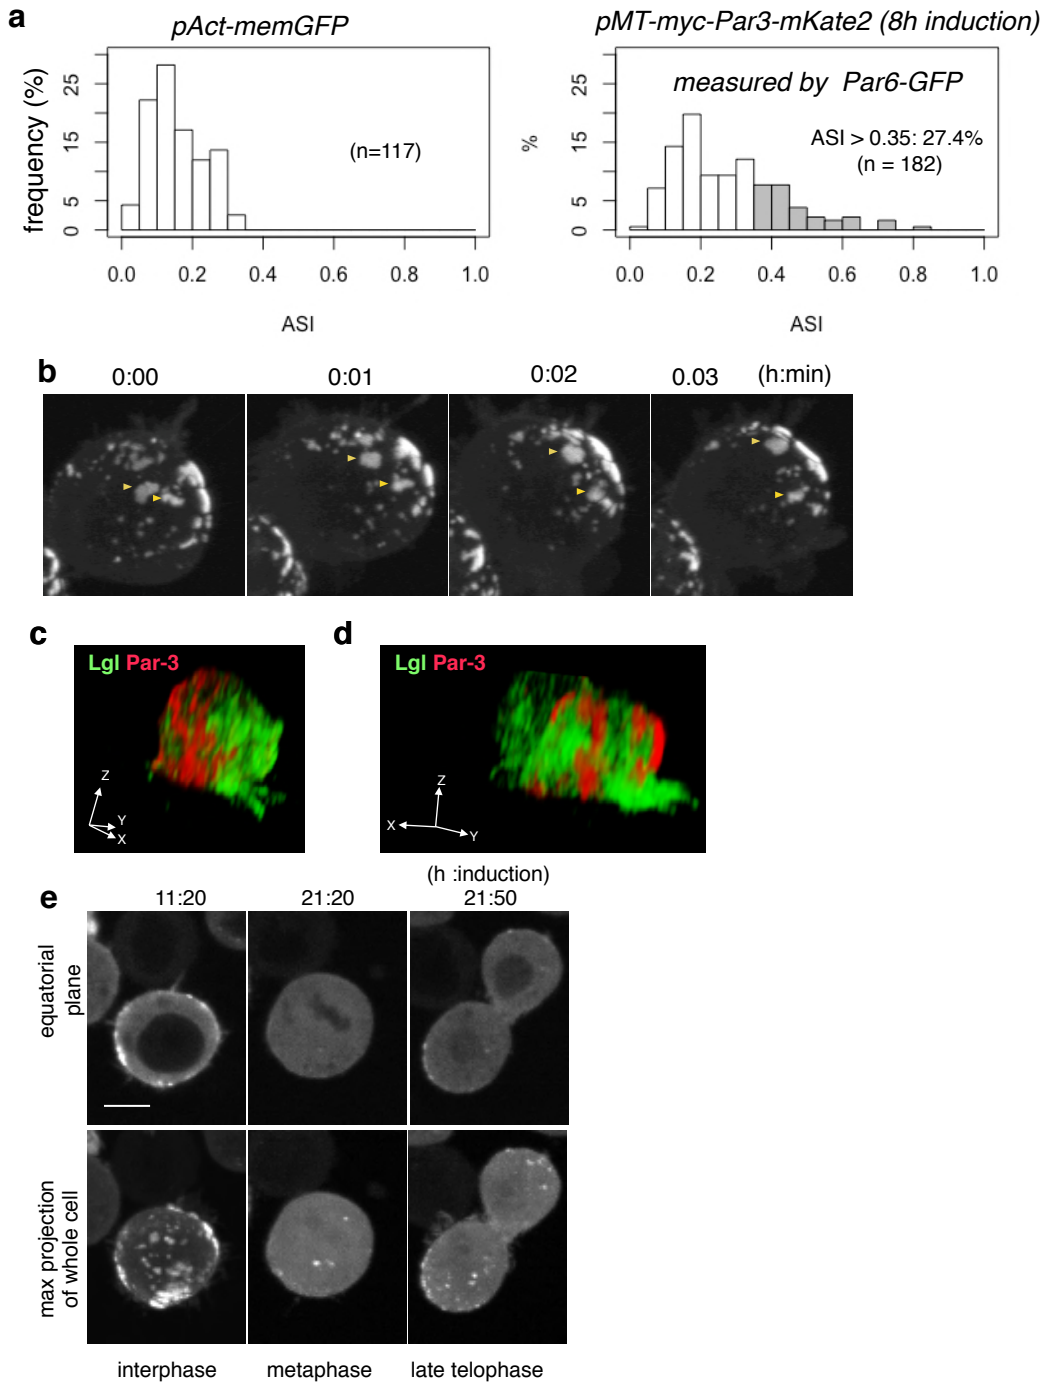



## Fig. 4

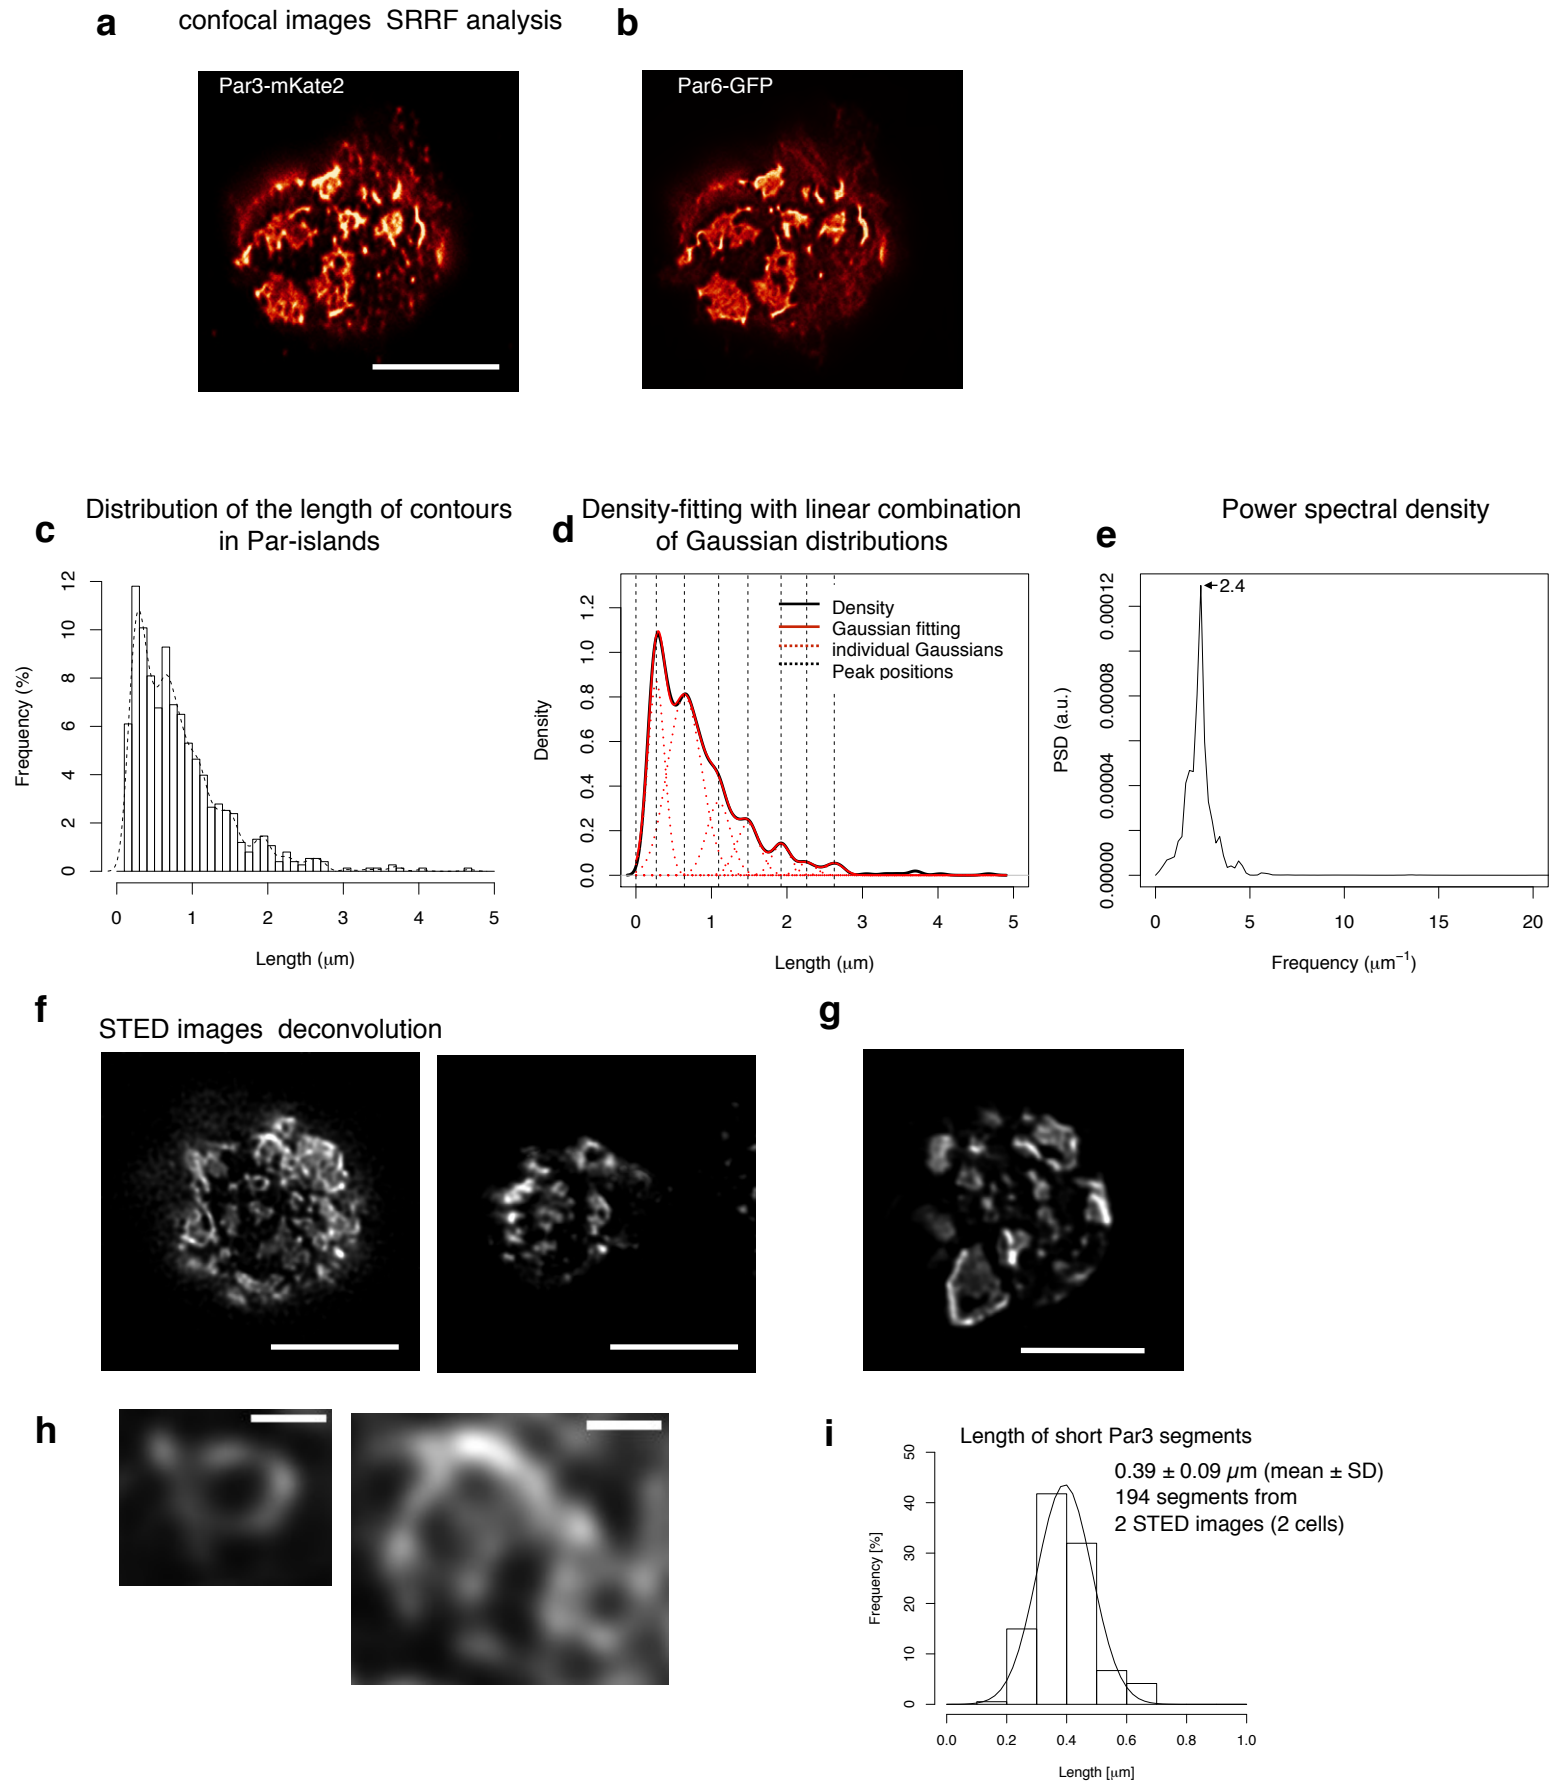

## Fig. 5

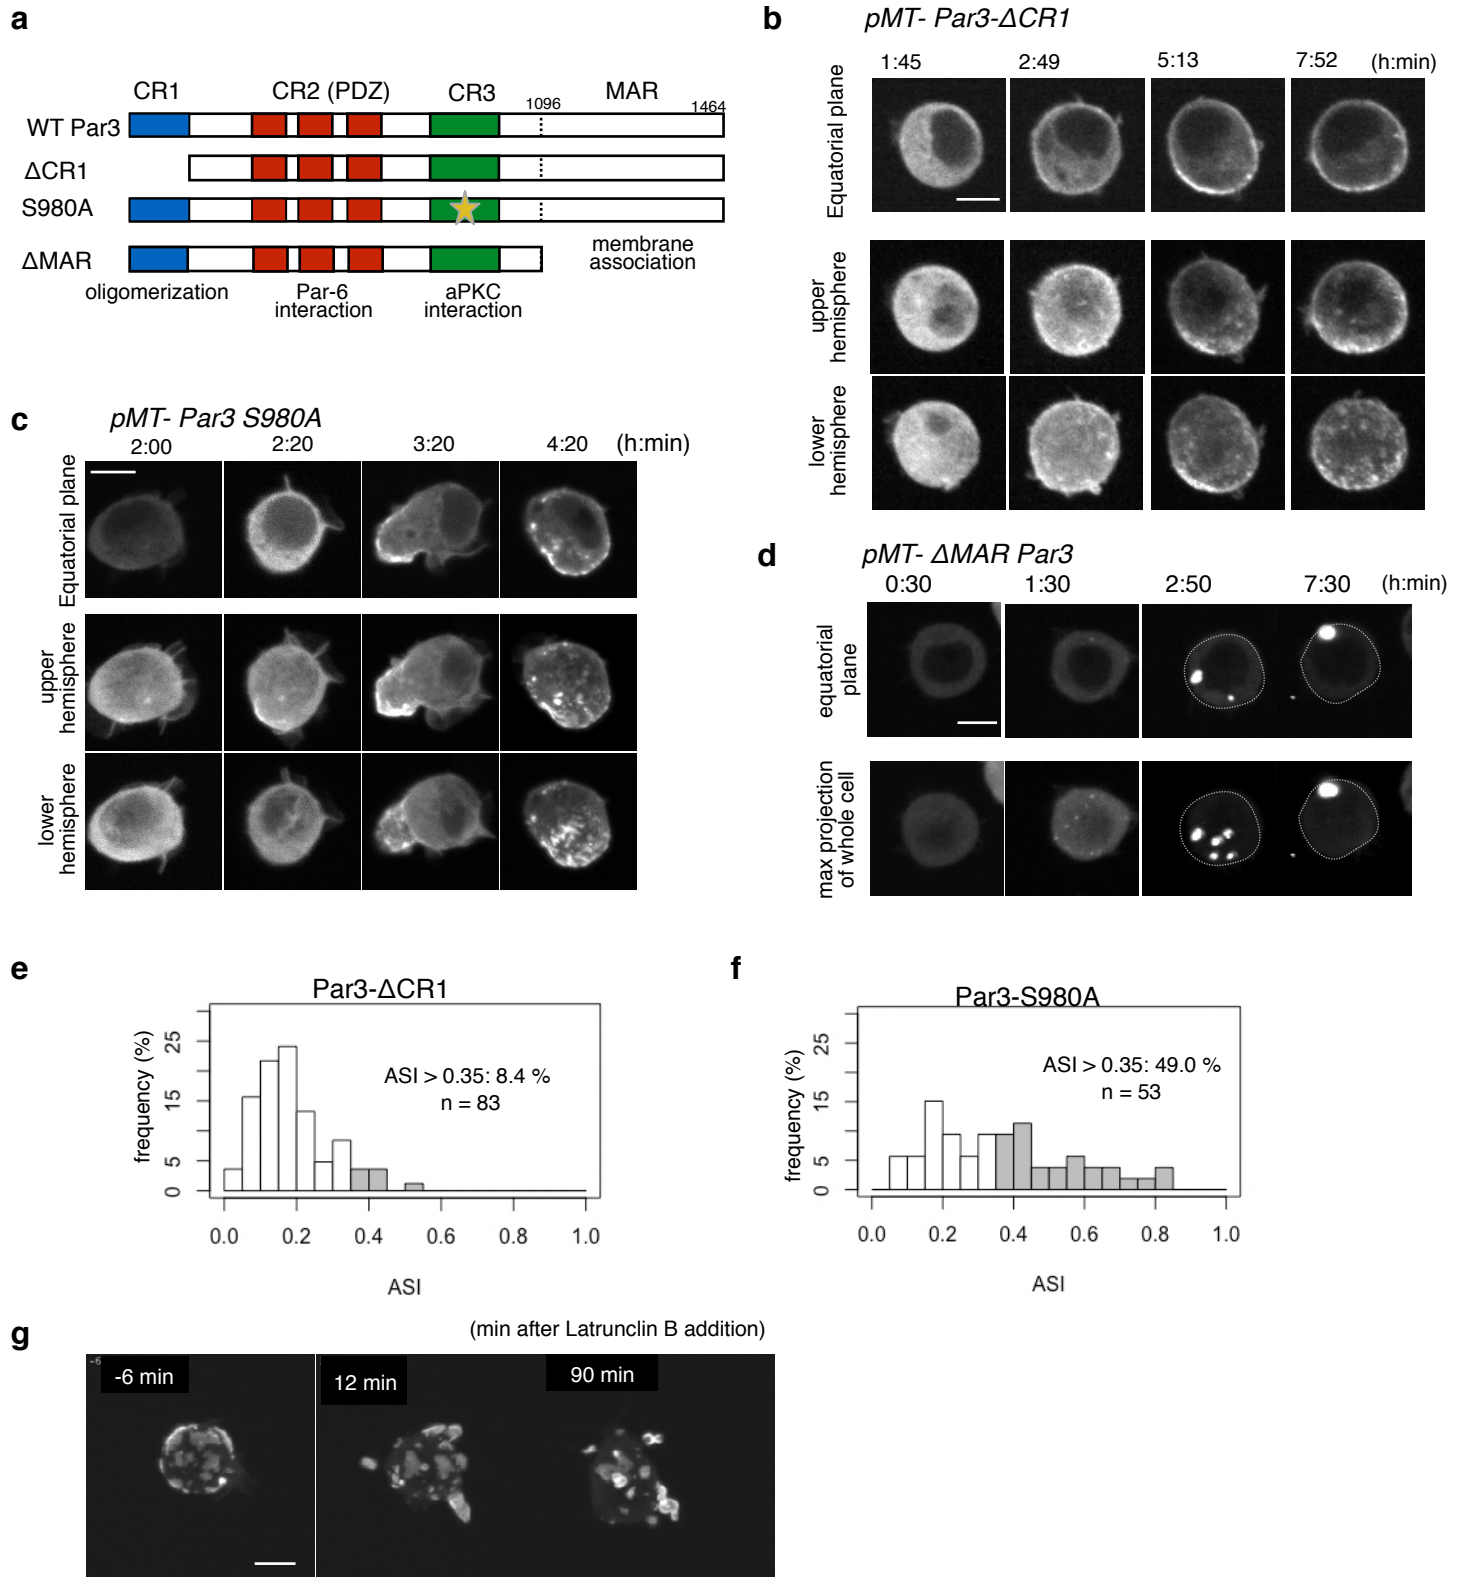

Source: https://www.biorxiv.org/content/biorxiv/early/2019/01/17/523589.full.pdf
